# 1 Cell Diameter in *Bacillus subtilis* is Determined by the Opposing Actions of Two Distinct 2 Cell Wall Synthetic Systems

3  
4 Michael F. Dion<sup>1,2,8</sup>, Mrinal Kapoor<sup>1,2,8</sup>, Yingjie Sun<sup>1,2,8</sup>, Sean Wilson<sup>1,2</sup> Joel Ryan<sup>3,4</sup>, Antoine Vigouroux<sup>5,6</sup>,  
5 Sven van Teeffelen<sup>5</sup>, Rudolf Oldenbourg<sup>7</sup>, and Ethan C. Garner<sup>1,2,4\*</sup>  
6

7 <sup>1</sup> Department of Molecular and Cellular Biology, Harvard University, Cambridge, United States.

8 <sup>2</sup> Center for Systems Biology, Harvard University, Cambridge, United States.

9 <sup>3</sup> Department of Biology II, Ludwig-Maximilians-Universität München, Martinsried, Germany

10 <sup>4</sup> Physiology Course, Marine Biological Laboratory, Woods Hole, USA.

11 <sup>5</sup> Synthetic Biology Laboratory, Institut Pasteur, Paris, France.

12 <sup>6</sup> Microbial Morphogenesis and Growth Laboratory, Institut Pasteur, Paris, France.

13 <sup>7</sup> Marine Biological Laboratory, Bell Center, Woods Hole, United States

14 <sup>8</sup> These authors contributed equally to this work.

15  
16 Corresponding Author: Ethan C. Garner

17 NW 445.20, Northwest Building, 52 Oxford Street, Cambridge, MA 02138

18 \*E-mail: [egarner@g.harvard.edu](mailto:egarner@g.harvard.edu)  
19

## 20 Abstract

21 Rod shaped bacteria grow by adding material into their cell wall via the action of two spatially distinct enzymatic systems:  
22 The Rod system moves around the cell circumference, while the class A penicillin-binding proteins (aPBPs) are  
23 unorganized. To understand how the combined action of these two systems defines bacterial dimensions, we examined how  
24 each system affects the growth and width of *Bacillus subtilis*, as well as the mechanical anisotropy and orientation of  
25 material within their sacculi. We find that rod diameter is not determined by MreB, rather it depends on the balance between  
26 the systems: The Rod system reduces diameter, while aPBPs increase it. RodA/PBP2A can both thin or widen cells,  
27 depending on its levels relative to MreBCD. Increased Rod system activity correlates with an increased density of directional  
28 MreB filaments, and a greater fraction of directionally moving PBP2A molecules. This increased circumferential synthesis  
29 increases the amount of oriented material within the sacculi, increasing their mechanical anisotropy and reinforcing rod  
30 shape. Together, these experiments explain how the combined action of the two main cell wall synthetic systems build rods  
31 of different widths, a model that appears generalizable: *Escherichia coli* containing Rod system mutants show the same  
32 relationship between the density of directionally moving MreB filaments and cell width.  
33  
34

## 35 Introduction

36 While the length of *Bacillus subtilis* rods increases as a function of their growth rate <sup>1</sup>, their width remains constant across  
37 different growth conditions <sup>2</sup>. How bacteria define and maintain these rod shapes with such precision is not understood, but  
38 it must involve mechanisms controlling both the rate and location of glycan insertion into the peptidoglycan (PG) sacculus,  
39 the enveloping heteropolymer meshwork that holds cells in shape <sup>3</sup>. In order to understand how bacteria grow in defined  
40 shapes, we need to understand not only where these enzymes act, but how their activity affects the geometry and  
41 arrangement of material within the sacculus.

42  
43 The PG for cell elongation is synthesized by two families of penicillin-binding proteins (PBPs). The class A penicillin-binding  
44 proteins (aPBPs) both polymerize and cross-link glycans. The class B penicillin-binding proteins (bPBPs) cross-link <sup>4,5</sup> the  
45 glycans polymerized by the glycosyltransferase RodA <sup>6</sup>. bPBPs and RodA are components of the “Rod complex”, a group  
46 of proteins essential for rod shape (**Figure 1A**). In *B. subtilis*, this contains RodA, the class B transpeptidase PBP2A, MreC,  
47 MreD, RodZ, and filaments of MreB, an actin homolog <sup>7,8</sup>. MreB polymerizes together with other MreB homologs into short,  
48 highly curved filaments on the membrane <sup>9,10</sup>. To maximize their interaction with the membrane these curved filaments  
49 deform to the membrane, orienting along the direction of highest inward membrane curvature, pointing around the rod width  
50 <sup>11</sup>. Oriented by their association with MreB filaments, the Rod complex moves directionally around the cell circumference,  
51 driven by the PG synthetic activity of RodA/PBP2A <sup>12-15</sup>. This radial motion of independent filament-enzyme complexes are  
52 believed to insert PG strands around the rod width <sup>16</sup>.

53  
54 aPBPs also affect rod shape, as *B. subtilis* cells lacking them are thinner <sup>17</sup>. Single molecule and biochemical studies  
55 indicate aPBPs and the Rod system are both spatially and functionally distinct <sup>6,14</sup>: While Rod complexes move around the  
56 cell width, aPBPs have never been seen to move directionally. Rather, they diffuse within the membrane, occasionally  
57 pausing and remaining immobile for a few seconds <sup>14</sup>. Furthermore, the synthetic activity of either aPBPs or the Rod  
58 complex can be inhibited without affecting the activity or motions of the other <sup>6,14</sup>. Given that both synthetic systems are  
59 required for growth, but that Rod complex activity is spatially organized while aPBP activity is not (**Figure 1A**), it is not clear  
60 how these two PG synthetic machineries work together to create a rod-shaped sacculus of a given width.

61  
62 Current models of rod width have focused on MreB filaments, attributing the altered widths of *Escherichia coli* MreB mutants

63 to possible changes in MreB filament curvature, twist, angle, or localization to negative Gaussian curvature<sup>18-24</sup>. Not only do  
64 these models lack the effects of aPBP mediated synthesis, they are: A) theoretical, as these proposed changes in filament  
65 curvature or twist have not been structurally validated, or B) difficult to reconcile in *B. subtilis*, which has no detectable  
66 negative Gaussian curvature<sup>11</sup> or skew in filament angle relative to the cell body<sup>11-13,25</sup>.

67 Rather than focusing on MreB alone, we sought to develop a more thorough understanding of how the synthesis of both  
68 organized and unorganized PG affects the width and growth of *B. subtilis*, as well as their effects on the organization and  
69 mechanics of cell wall material. We find that aPBP and Rod complex-mediated PG synthesis have opposing effects on rod  
70 width, and that cell diameter depends on their balance. The rate cells add surface area is largely unaffected by the level of  
71 any one system, unless both become limiting. As MreBCD expression increases and rods thin, we observe a greater density  
72 of directionally moving MreB filaments and a greater fraction of directionally moving enzymes. Increased Rod complex  
73 activity creates a greater proportion of oriented material within the sacculus, causing the rod to stretch less across its width  
74 and more along its length in response to internal turgor. Finally, we show that the different widths of *E. coli* Rod mutants  
75 also show correlation between the density of directionally moving MreB filaments and cell width, giving a simple,  
76 generalizable model that may explain the role of the Rod system in cell width.

## 77 **Results**

### 78 **The Rod and aPBP systems have opposing effects on cell diameter**

79 The width of rod-shaped bacteria has been attributed to properties encoded within MreB filaments<sup>19,21,24,26</sup>. We reasoned  
80 that if width were defined by MreB, then the *mreBCD* genes from larger bacteria should produce cells with larger diameters.  
81 To test this, we replaced the *B. subtilis* *mreBCD* operon with the *mreBCD* operon from *Bacillus megaterium*, a nearly 2-fold  
82 wider bacterium. Surprisingly, these cells grew as rods only slightly wider than wild type (WT) *B. subtilis*, and by further  
83 overexpressing *B. megaterium* *mreBCD* cells became even thinner (36 nm) (**Figure 1B, S1A**), suggesting that MreB  
84 filaments themselves do not encode a specific rod width.

85

86 We next examined how width changed as we independently controlled the levels of the two main *B. subtilis* PG synthetic  
87 systems. We created strains where expression of PBP1 (the major aPBP, encoded by *ponA*) was under IPTG control. As  
88 PG synthesis by the Rod system depends upon MreB<sup>14</sup>, we created strains where the native *B. subtilis* *mreBCD* operon  
89 was under xylose control. We grew these strains at different induction levels, then measured their steady-state widths using

90 fluorescence microscopy. For a subset of inductions, we measured the relative protein abundance using proteomic mass  
91 spectrometry, normalizing to the levels in WT cells grown in CH media (**Supplemental File 1**).

92

93 Varying *mreBCD* inductions revealed the Rod system has a thinning effect on rod shape. In the lowest inductions supporting  
94 growth, rods were ~2-fold wider than WT, with some cells losing rod shape. As we increased *mreBCD* induction, cells  
95 became thinner, reaching WT width when MreB abundance recapitulated WT levels (**Figure 1C, Figure S1B**). Inductions  
96 above this point resulted in cells becoming 33 nm thinner than WT, and thinner still (58 nm) in *mreBCD* merodiploids. As  
97 above, these results demonstrate MreB filaments do not *define* a given rod diameter, rather as previously hypothesized<sup>11,27</sup>,  
98 they indicate the Rod system *reduces* cell diameter.

99

100 Different *ponA* inductions revealed that aPBPs have a widening effect: With no IPTG, cells contained 0.25 the amount of  
101 WT PBP1, and were ~23% thinner than WT, similar to  $\Delta$ *ponA* strains<sup>17</sup> (**Figure 1D, Figure S1C**). As we increased *ponA*  
102 induction cells became wider, reaching WT widths when PBP1 abundance recapitulated WT levels. Inductions above this  
103 point caused cells to become increasingly wider, and by expressing *ponA* under stronger promoters or in merodiploids, we  
104 could produce rods almost twice WT diameter.

105

106 These results demonstrate that the aPBPs and Rod system have opposing effects: The circumferentially moving Rod  
107 complex reduces cell diameter, while the spatially unorganized aPBPs increase diameter. We hypothesized that a balanced  
108 expression of each system could produce WT diameter rods. We combined the IPTG-inducible *ponA* and xylose-inducible  
109 *mreBCD* alleles into one “dual-inducible” strain. We found six different pairs of xylose and IPTG concentrations that  
110 produced rods of WT diameter (**Figure 1E, Figure S1D**), even though individually, each induction resulted in perturbed  
111 diameters in the singly-inducible parental strains (**Figure 1C-D**). Relative quantitation of protein levels revealed that, in the  
112 induction pairs at or beneath WT levels, these cells contained reduced, but relatively balanced amounts of PBP1 relative to  
113 MreB. To determine this balance in native conditions, we measured the widths and protein levels of WT cells grown in  
114 different media that result in different growth rates (**Figure 1F, Figure S1E**). Together, this data suggested width depends  
115 on the balance between the aBPB and the Rod systems. By plotting the ratio of the [Fold change PBP1] / [Fold change  
116 MreB] for all conditions in the data sets against their width (**Figure 1G**), we found that *B. subtilis* maintains its diameter  
117 within ~5% of WT only when this ratio was within a range of 0.8 to 1.5; outside of this range, cell diameter diverged. WT

118 cells in different media showed PBP1/MreB ratios ranging from 0.9 to 1.5. Likewise, the induction pairs yielding WT widths  
119 in the dual-inducible strain were within 0.8 to 1.0, only when their levels did not exceed WT. In contrast, the single-inducible  
120 *ponA* or *mreBCD* strains were within 5% of WT width only when the ratio was within this range; outside of it, width rapidly  
121 diverged. Together, these results indicate that, at the level of PG insertion, cell width is affected by the levels of the two  
122 opposing synthetic systems that insert material into the sacculus (**Figure 1H**).

123  
124 **RodA can function outside of the Rod system to widen cells, but only when PBP2A is also in excess.** Given that  
125 RodA acts within the Rod complex with PBP2A (encoded by *pbpA*) to synthesize PG<sup>14</sup>, titrations of *rodA* and *pbpA* should  
126 show the same “thinning effect” as *mreBCD*. However, *rodA* overexpression can restore WT width to  $\Delta$ PBP cells<sup>6</sup>, a  
127 widening activity similar to *ponA*. To investigate this discrepancy, we made two sets of strains where *rodA* or *pbpA* (as the  
128 only elongation-specific bPBP in the cell) were under the control of increasingly strong inducible promoters. As before<sup>28,29</sup>,  
129 low *rodA* or *pbpA* yielded wide cells; and as induction increased, cells gradually thinned to WT width, suggesting both are  
130 required for functional Rod complexes. However, while we expected excess RodA to create thinner cells, once *rodA*  
131 induction exceeded the level required for normal width, it behaved like excess *ponA*, fattening cells far beyond WT diameter  
132<sup>6</sup> (**Figure 2A**). In contrast, *pbpA* inductions beyond this point had a negligible effect on diameter.

133  
134 Given that RodA and PBP2A must interact to synthesize PG<sup>30</sup>, we tested if the widening caused by RodA overexpression  
135 required excess PBP2A. We created two strains that had *rodA* under xylose control; one contained native *pbpA*, and the  
136 other had *pbpA* under IPTG control (both as the only elongation-specific bPBP in the cell). As before, when *pbpA* was under  
137 native control, depletion or overexpression of *rodA* caused diameter to increase (**Figure 2B**). In contrast, when *pbpA* was  
138 held at the lowest induction required for WT width and *rodA* was simultaneously overexpressed, cells remained at WT  
139 widths. However, these RodA-overproducing cells could be made increasingly wider by increasing *pbpA* induction (**Figure**  
140 **2B**), demonstrating excess RodA requires excess PBP2A to increase width.

141  
142 These results suggested RodA/PBP2A widens cells when their levels exceed the rest of the Rod complex. If this hypothesis  
143 is correct, wide cells caused by RodA/PBP2A overexpression should become thinner if MreBCD is increased, perhaps  
144 recruiting the diffusive excess RodA/PBP2A into circumferentially-moving, “thinning” Rod complexes. Indeed, while strong  
145 induction of *rodA* made wide cells, simultaneous overexpression of a second copy of *mreBCD* reduced cell diameter

146 **(Figure 2C)**, a narrowing far greater than what we observed when overexpressing *mreBCD* in otherwise WT strains **(Figure**  
147 **1C)**. Thus, the aPBP-like widening activity of RodA/PBP2A likely occurs once they exceed some level of MreBCD, possibly  
148 reflecting a saturation of binding sites within Rod complexes.

149

150

151 **Growth rates are maintained across a wide range of enzyme levels, unless both systems become limiting.**

152 We next examined how each PG synthetic system affected the rate of cell growth in our dual-induction strain using two  
153 assays: 1) single-cell measurements of the rate of surface area addition<sup>31</sup> under agar pads and 2) population measures of  
154 growth in a shaking plate reader. First, we examined the growth of the dual-inducible strain at the *mreBCD* and *ponA*  
155 inductions that produced WT widths **(Figure 1E)**. At the lowest induction pairs, growth was greatly reduced in both assays,  
156 and increased with each increasing induction pair **(Figure 2D)**, up to the induction pair that produced WT PBP1 and MreB  
157 protein levels. Thus, growth can be reduced if both PG synthesis systems become limiting.

158

159 Next, we assayed growth as we titrated either *mreBCD* or *ponA* while holding the other constant. Similar to *E. coli* MreB  
160 studies<sup>22,32,33</sup>, both assays showed no difference in growth across a wide range of *mreBCD* inductions, except at the lowest  
161 induction where cells frequently lost rod shape. Similarly, both assays saw no difference in growth across our *ponA*  
162 induction range. Thus, even though these cells have different geometries, they add new surface area at the same rate. We  
163 next examined how extremely low levels of aPBPs affected growth. Similar to previous observations<sup>17,34,35</sup>, both  $\Delta ponA$  and  
164  $\Delta aPBP$  ( $\Delta pbpF$ ,  $\Delta pbpG$ ,  $\Delta pbpD$ ,  $\Delta ponA::kan$ ) strains showed a marked reduction in bulk growth, a defect rescued by  
165 overexpression of RodA<sup>6,36</sup>. However, the single cell measurements revealed a surprise: Both  $\Delta ponA$  and  $\Delta aPBP$  cells  
166 showed no defect in their single-cell growth rate, adding surface area at the same rate as WT, as did RodA overexpressing  
167  $\Delta aPBP$  cells **(Figure 2D)**. Given  $\Delta aPBP$  cells display an increased rate of lysis that can be suppressed by RodA  
168 overexpression<sup>6,36</sup>, it appears the population growth rate defect of aPBP-deficient cells arises not from a reduction in growth  
169 rate, but from an increased frequency of death.

170

171

172 **Increased MreBCD increases the density of directionally moving MreB filaments and the fraction of directionally**  
173 **moving synthetic enzymes.**

174 To gain a mechanistic link between the level of the PG synthetic systems to cell width, we sought to develop microscopic  
175 measures of their activity. While the fraction of stationary aPBPs would be difficult to quantify, Rod complexes exhibit a  
176 more quantifiable phenotype: As their motion is driven by PG synthesis, the cellular activity of the Rod system can be  
177 measured by quantitating the number of directionally moving MreB filaments<sup>37</sup>. We developed an analysis method that,  
178 using total internal reflection fluorescence microscopy (TIRFM) data, determines the density of MreB filaments moving  
179 directionally around the cell. Filaments undergoing directed motion are detected by taking advantage of the temporal  
180 correlation occurring between adjacent pixels across the cell width as objects move through them. These objects are then  
181 counted over a given time and then normalized to the total cellular surface area (**Figure 3A, S3A-F**). To evaluate the  
182 robustness of this approach to filament number, velocity, angle, and length, we simulated TIRFM time-lapses of MreB  
183 filaments in cells (**Figure S3G-K**). This revealed this approach was more accurate than counting filaments in the same data  
184 with particle tracking. Furthermore, when applied to real TIRFM movies of MreB filaments, this approach yielded numbers  
185 comparable to tracking MreB filaments inside cells imaged with TIRF - structured illumination microscopy (TIRF-SIM)  
186 (**Figure S3L**). With this analysis tool, we examined how the density of directionally moving MreB filaments related to rod  
187 width as we titrated the expression of an inducible *mreB-sw-msfGFP*, *mreCD* operon expressed as the only source at the  
188 native locus. This analysis revealed a well fit, apparently linear correlation between directional filament density and width  
189 (**Figure 3B**). Thus, the density of directionally moving MreB filaments reduces cell width, possibly by promoting directional  
190 PG synthesis.

191  
192 To this end, we next examined how MreBCD levels affected PBP2A motion. Multiple studies have noted PBP2A molecules  
193 exist as a mixed population; some diffuse within the membrane, while others move directionally<sup>12-14</sup>. We titrated *mreBCD*  
194 induction as we tracked the motions of PBP2A molecules (expressed at the native locus as a HaloTag fusion, sparsely  
195 labeled with JF-549<sup>38</sup>). At low *mreBCD*, only a small fraction of PBP2A moved directionally. As we increased *mreBCD*  
196 induction, an increasing fraction of PBP2A molecules moved directionally (**Figure 3C, Movie SM1**), demonstrating that  
197 *mreBCD* limits the amount of directional PBP2A.

198  
199 **Increased MreBCD:PBP1 correlates with an increased amount of oriented material and structural anisotropy of the**  
200 **cell wall.**

201 To gain more insight into how an increased density of directional rod complexes can reduce rod width, we used polarization  
202 microscopy to understand how increased circumferential synthesis affected the organization of material within the cell wall.  
203 Polarization microscopy reports on both the angle and extent of orientation within optically anisotropic (or birefringent)  
204 materials<sup>39</sup>, and has been used to assay the orientation of various materials, including plant cell walls<sup>40-42</sup> and mitotic  
205 spindles<sup>43</sup>. Polarization microscopy revealed purified WT sacculi show birefringence, indicating that some fraction of the  
206 material within them is oriented. Focused at their surface, sacculi showed a predominant slow axis oriented along the rod  
207 length (**Figure 4A, Movie SM2**). Given that amino acids have a higher refractive index compared to sugars, this suggests  
208 (in agreement with previous models<sup>44</sup>) the peptide crosslinks are predominantly oriented along the rod length, and the  
209 glycans are oriented around the circumference.

210  
211 We then examined how the balance between the Rod and aPBP systems affected the relative amount of oriented material  
212 in the wall. We grew our dual-induction strain under three different induction conditions to create varied width cells: wide  
213 (high *ponA*, low *mreBCD*), normal (*ponA* and *mreBCD* induced at WT levels), and skinny (low *ponA*, high *mreBCD*) (**Figure**  
214 **4B**), purified their sacculi, and quantified their total retardance with polarization microscopy (**Figure 4C, Movie SM3**).  
215 Retardance is the differential optical path length for light polarized parallel and perpendicular to the axis of molecular  
216 alignment; alternatively, it is defined as birefringence ( $\Delta n$ ) times the physical path length through an anisotropic material.  
217 Wide cells (high *ponA*, low *mreBCD*) had the lowest retardance, skinny cells (low *ponA*, high *mreBCD*) had the highest  
218 retardance, and normal cells were in between (**Figure 4D**). Because retardance depends on both the thickness of material  
219 (path length) and the degree of its orientation ( $\Delta n$ ), we normalized the retardance of each sample to the mean thickness of  
220 the cell walls of each induction condition, obtained using transmission electron microscopy (**Figure S4A**). This revealed that  
221 the skinny cell walls had more highly ordered material ( $\Delta n$ ) per path length (nm) of cell wall thickness, and that wide cell  
222 walls had the least (**Figure 4E**). Thus, in agreement with recent atomic force microscopy studies showing orientated glycans  
223 in *E. coli* require MreB<sup>16</sup>, these experiments demonstrate that as Rod system activity increases, so does the amount of  
224 oriented material in the wall.

225  
226 The sacculi of *E. coli* and *B. subtilis* are mechanically anisotropic, stretching more along their length than across their width  
227<sup>44-46</sup>. To test how the ratio of oriented to unoriented PG synthesis affected this property, we grew our dual-inducer strain at  
228 the three *mreBCD:ponA* inductions above, labeled their walls with Alexa-488-D-amino carboxamides<sup>4</sup>, and assayed the



229 dimensions of their cell walls before and after hyperosmotic shocks (**Figure 4F-G**). This revealed that increased Rod system  
230 activity correlated with an increased mechanical anisotropy of the sacculus: As we increased the expression of MreBCD  
231 relative to PBP1A, rods shrank less across their width, and more along their length (**Figure 4H, S4B-C**). Thus, the Rod  
232 system acts to reinforce rod shape against internal turgor by promoting oriented PG synthesis around the rod.

233

### 234 ***E. coli* Rod mutants also show a correlation between cell width and the density of directionally moving filaments.**

235 Previous studies have examined how MreB and PBP2 mutations affect the shape of *E. coli*, hypothesizing that their  
236 abnormal widths arise from changes in the curvature, twist, or angle of MreB filaments. Our observations in *B. subtilis*  
237 suggested an alternative explanation: Abnormal width might arise from simply changing the amount of Rod system activity.  
238 We tested this by measuring the density of directional GFP-MreB filaments in these same mutant *E. coli* strains. As a  
239 benchmark, we first assayed the width of *E. coli* as we titrated the expression of mreB-sw-msfGFP using CRISPRi against  
240 msfGFP<sup>47 28</sup>. As in *B. subtilis*, this yielded an inverse relationship between directional MreB filament density and cell width  
241 (**Figure 5A**). Examining each group of mutants showed the same result: 1) An identical trend was observed for the  
242 mutations hypothesized to change filament twist<sup>19</sup>, 2) as well as in the mutations designed to change filament curvature<sup>24</sup>.  
243 And 3) notably, the same correlation between directional filament density and cell width was observed in strains where *E.*  
244 *coli mrdA* (PBP2) was replaced with *mrdA* genes from other species<sup>22</sup>. TIRF-SIM imaging of these MreB mutants revealed  
245 some insight into these effects (**Movie SM4**): Some of the wide mutants showed either A) longer but fewer filaments, or B) a  
246 large fraction of immobile filaments. Conversely, some thinner mutants appeared to have more, but shorter filaments. Finally  
247 4), while Colavin et al. hypothesized that RodZ reduces width by changing MreB filament curvature<sup>24</sup>, we found that  
248 increased RodZ induction increased MreB filament density as cells thinned (**Figure 5B, Movie SM5**). This suggests that the  
249 decrease in cell width most likely occurs from to RodZ's ability to nucleate MreB filaments<sup>48</sup> rather than changing their  
250 curvature. Thus, the density of directionally moving Rod complexes correlates with cell width in both *B. subtilis* and *E. coli*  
251 across multiple genetic perturbations.

252

### 253 **Discussion**

254 The shape of bacteria is defined by their cell walls; these experiments demonstrate that the two systems that insert PG into  
255 it have opposing roles on its shape. Due to the intrinsic orienting of MreB filaments around the rod width<sup>11</sup>, the Rod system  
256 inserts circumferentially oriented material around the rod circumference, reducing its diameter. As the number of MreB

257 filaments increases, so does the fraction of directional enzymes and the amount of oriented material in the wall. In contrast,  
258 the aPBPs do not move circumferentially, inserting material that isotropically enlarges the sacculus. Our data indicates the  
259 macroscopic shape of the sacculus arises from the nature of the material inserted into it: The more it is oriented around the  
260 rod circumference by the Rod complex, the less the rod stretches across its width, and the more it stretches along its length  
261 **(Figure 5C).**

262  
263 If the balance between the two PG synthetic systems is perturbed, the shape of the sacculus becomes altered, though its  
264 rate of expansion remains constant. As both systems utilize the same pool of lipid II<sup>49</sup>, the flux through each may depend on  
265 their relative levels; if one is reduced, the flux through the other may increase. This would explain why disrupting the Rod  
266 system causes cells to swell<sup>27,29,50-52</sup>: In the absence of Rod-mediated thinning, aPBPs add more material uniformly over the  
267 cell surface. Likewise, in the absence of aPBP-mediated widening, increased flux through the Rod system would explain  
268 why cells become extremely thin<sup>17,53</sup>. However, if both systems are equivalently reduced, cells grow with normal widths, but  
269 at slower rates; as long as the activities are balanced - identical shape arises from the balanced levels of enzymes, but  
270 growth is reduced due to their combined activity becoming limiting. This would explain why *ponA* mutations rescue *mreB*  
271 deletions<sup>54</sup>; equally crippling both systems may rebalance the activities such that the cell retains normal shape and viability.

272

### 273 **Implications for the role of MreB in rod width determination.**

274 Given that 1) *mreBCD* from the wide bacterium *B. megaterium* creates close to normal diameter *B. subtilis* rods, and 2) *B.*  
275 *subtilis* diameter depends on *mreBCD* levels, we find it unlikely that any property of MreB filaments defines a given cell  
276 diameter. Rather, MreB appears to be one component of a rod-thinning system, working in opposition to aPBP-mediated  
277 widening. Indeed, *in vitro* studies have revealed MreB filaments are extremely curved (> 200 nm), allowing them to deform  
278 to, and orient around the width of bacteria of any larger width<sup>9,11</sup>. While it remains possible that given MreB mutations or  
279 interactions with RodZ could indeed alter filament curvature or twist<sup>19,21,24,26</sup>, these experiments suggest a more  
280 parsimonious explanation for their effect on Rod activity: These mutations alter MreB's polymerization dynamics or cellular  
281 distribution. Reducing the amount or number of active MreB polymers would reduce Rod activity, causing cells to widen.  
282 Likewise, mutations altering MreB's polymer length distribution or tendency for filaments to bundle would cause the  
283 distribution of Rod activity to become non-uniform, causing some parts of the cell to thin while others would widen, as  
284 previously observed for certain MreB mutants<sup>12,27</sup>.

285

286 Additionally, our experiments reinforce observations that aPBPs and RodA (when in excess to MreBCD) serve reparative,  
287 anti-lytic roles: aPBP-deficient cells grow at the same rate as WT, yet have an increased frequency of death, lysing as thin  
288 rods without losing shape<sup>6,36</sup>. Likewise, aPBP-mediated synthesis increases upon endopeptidase overexpression in *E. coli*  
289<sup>55</sup>. Given the active state of aPBPs correlates with single aPBP molecules displaying periods of transient immobility<sup>14,56</sup>,  
290 their synthesis may be localized to small (<50 nm) regions. Combined, these observations support a model where aPBPs  
291 synthesize material to fill gaps in the PG meshwork<sup>36,14</sup>. Gaps could arise via mechanical damage, hydrolases<sup>55</sup>, or  
292 between the imperfectly oriented strands built by the Rod complex<sup>11</sup>. If this model is correct, the different spatial activities of  
293 these two systems might allow the sacculus to maintain integrity at any Rod/aPBP ratio: the fewer the Rod complexes, the  
294 larger the gaps filled by aPBPs.

295

296 While many different activities affect the shape of the sacculus, such as its cleavage by hydrolases or rigidification by wall  
297 teichoic acids<sup>11</sup>, the first process defining its geometry is the spatial coordination controlling where glycans are inserted into  
298 it. While these experiments give a coarse-grained description into how each synthetic system affects cell shape, a fine  
299 scale, mechanistic understanding remains to be determined - How does aPBP activity make cells wider? How does  
300 increased Rod activity make cells thinner? Understanding the physical mechanisms causing these changes will require not  
301 only a better understanding of the molecular architecture of the sacculus, but also an investigation into how the enzymes  
302 downstream of glycan insertion affect the shape and mechanics of sacculi as they subsequently modify, remodel, and break  
303 down the nascently-polymerized glycan architecture.

304

### 305 **Acknowledgements**

306 We would like to thank Carl Wivagg, Ye Jin Eun, Leigh Harris, and Thomas Bernhardt for helpful advice and discussions,  
307 Georgia Squyres for reading of the manuscript and TIRF-SIM acquisition, and Luke Lavis for his generous gift of JF dyes. We  
308 thank Z. Gitai and K.C. Huang for providing strains. TIRF-SIM was performed at the Advanced Imaging Center at Janelia  
309 Research Campus, a facility jointly supported by the Gordon and Betty Moore Foundation and Howard Hughes Medical  
310 Institute. This work was funded by National Institutes of Health Grants R01GM114274 to RO, and DP2AI117923-01 to EG,  
311 as well as a Smith Family Award, Searle Scholar Fellowship, and support from the Volkswagen Foundation to EG and SVT.  
312 This work was performed in part at the Center for Nanoscale Systems at Harvard University, supported by NSF ECS-0335765.

313

314 **Author Contributions.**

315 *B. subtilis* strains were cloned by MD, YS, and MK. All width and bulk growth measurements of *B. subtilis* were done by MD,  
316 and *E. coli* widths by YS. *E. coli* CRISPRi strains were cloned by AV, who was supervised by SVT. Single cell growth rates  
317 were done by YS and MK. TIRFM and tracking of PBP2A was done by MK. All TIRFM of MreB was done by YS. TIRF-SIM  
318 of MreB was done by YS, EG, and JR. Purified sacculi and proteomic mass spec sample preps were done by MD. YS wrote  
319 the code for analysis of single cell growth rate, filament density, and simulations of data. Polarization microscopy and  
320 analysis was conducted by JR, RO, and EG. SW did the FDAA synthesis, osmotic shocks, and TEM. The paper was written  
321 by EG, MK, MD, and YS.

322

323 **References**

- 324 1. Vadia, S. & Levin, P. A. Growth rate and cell size: a re-examination of the growth law. *Curr Opin Microbiol* **24**, 96–103  
325 (2015).
- 326 2. Sharpe, M. E., Hauser, P. M., Sharpe, R. G. & Errington, J. Bacillus subtilis cell cycle as studied by fluorescence  
327 microscopy: constancy of cell length at initiation of DNA replication and evidence for active nucleoid partitioning. *J Bacteriol*  
328 **180**, 547–555 (1998).
- 329 3. Vollmer, W., Blanot, D. & de Pedro, M. A. Peptidoglycan structure and architecture. *FEMS Microbiol Rev* **32**, 149–167  
330 (2008).
- 331 4. Lebar, M. D. *et al.* Reconstitution of Peptidoglycan Cross-Linking Leads to Improved Fluorescent Probes of Cell Wall  
332 Synthesis. *J Am Chem Soc* **136**, 10874–10877 (2014).
- 333 5. Banzhaf, M. *et al.* Cooperativity of peptidoglycan synthases active in bacterial cell elongation. *Mol Microbiol* **85**, 179–194  
334 (2012).
- 335 6. Meeske, A. J. *et al.* SEDS proteins are a widespread family of bacterial cell wall polymerases. *Nature* **537**, 634–638  
336 (2016).
- 337 7. Jones, L. J., Carballido-López, R. & Errington, J. Control of cell shape in bacteria: helical, actin-like filaments in Bacillus  
338 subtilis. *Cell* **104**, 913–922 (2001).
- 339 8. van den Ent, F., Amos, L. & Löwe, J. Bacterial ancestry of actin and tubulin. *Curr Opin Microbiol* **4**, 634–638 (2001).
- 340 9. van den Ent, F., Izoré, T., Bharat, T. A., Johnson, C. M. & Lowe, J. Bacterial actin MreB forms antiparallel double filaments.  
341 *Elife* **3**, e02634 (2014).
- 342 10. Salje, J., van den Ent, F., de Boer, P. & Lowe, J. Direct membrane binding by bacterial actin MreB. *Mol Cell* **43**, 478–487  
343 (2011).
- 344 11. Hussain, S. *et al.* MreB filaments align along greatest principal membrane curvature to orient cell wall synthesis. *Elife* **7**,  
345 1239 (2018).
- 346 12. Garner, E. C. *et al.* Coupled, circumferential motions of the cell wall synthesis machinery and MreB filaments in *B. subtilis*.  
347 *Science* **333**, 222–225 (2011).
- 348 13. Domínguez-Escobar, J. *et al.* Processive Movement of MreB-Associated Cell Wall Biosynthetic Complexes in Bacteria.  
349 *Science* **333**, 225–228 (2011).
- 350 14. Cho, H. *et al.* Bacterial cell wall biogenesis is mediated by SEDS and PBP polymerase families functioning semi-  
351 autonomously. *Nat Microbiol* **1**, 16172 (2016).
- 352 15. van Teeffelen, S. *et al.* The bacterial actin MreB rotates, and rotation depends on cell-wall assembly. *Proc Natl Acad Sci*  
353 *USA* **108**, 15822–15827 (2011).
- 354 16. Turner, R. D., Mesnage, S., Hobbs, J. K. & Foster, S. J. Molecular imaging of glycan chains couples cell-wall  
355 polysaccharide architecture to bacterial cell morphology. *Nat Comms* **9**, 1263 (2018).
- 356 17. McPherson, D. C. & Popham, D. L. Peptidoglycan synthesis in the absence of class A penicillin-binding proteins in Bacillus  
357 subtilis. *J Bacteriol* **185**, 1423–1431 (2003).
- 358 18. Ursell, T. S. *et al.* Rod-like bacterial shape is maintained by feedback between cell curvature and cytoskeletal localization.  
359 *Proc Natl Acad Sci USA* **111**, E1025–34 (2014).

- 360 19. Ouzounov, N. *et al.* MreB Orientation Correlates with Cell Diameter in Escherichia coli. *Biophys J* **111**, 1035–1043 (2016).
- 361 20. Shi, H., Bratton, B. P., Gitai, Z. & Huang, K. C. How to Build a Bacterial Cell: MreB as the Foreman of E. coli Construction. *Cell* **172**, 1294–1305 (2018).
- 362
- 363 21. Wang, S. & Wingreen, N. S. Cell shape can mediate the spatial organization of the bacterial cytoskeleton. *Biophys J* **104**,
- 364 541–552 (2013).
- 365 22. Tropini, C. *et al.* Principles of Bacterial Cell-Size Determination Revealed by Cell-Wall Synthesis Perturbations. *Cell*
- 366 *Reports* **9**, 1520–1527 (2014).
- 367 23. Shi, H. *et al.* Deep Phenotypic Mapping of Bacterial Cytoskeletal Mutants Reveals Physiological Robustness to Cell Size. *Curr Biol* **27**, 3419–3429.e4 (2017).
- 368 24. Colavin, A., Shi, H. & Huang, K. C. RodZ modulates geometric localization of the bacterial actin MreB to regulate cell
- 369 shape. *Nat Comms* **9**, 1280 (2018).
- 370 25. Olshausen, P. V. *et al.* Superresolution Imaging of Dynamic MreB Filaments in B. subtilis—A Multiple-Motor-Driven
- 371 Transport? *Biophys J* **105**, 1171–1181 (2013).
- 372 26. Shi, H., Bratton, B. P., Gitai, Z. & Huang, K. C. How to Build a Bacterial Cell: MreB as the Foreman of E. coli Construction.
- 373 *Cell* **172**, 1294–1305 (2018).
- 374 27. Harris, L. K., Dye, N. A. & Theriot, J. A. A Caulobacter MreB mutant with irregular cell shape exhibits compen... - PubMed -
- 375 NCBI. *Mol Microbiol* **94**, 988–1005 (2014).
- 376 28. Vigouroux, A., Oldewurtel, E., Cui, L., Bikard, D. & van Teeffelen, S. Tuning dCas9's ability to block transcription enables
- 377 robust, noiseless knockdown of bacterial genes. *Molecular Systems Biology* **14**, e7899 (2018).
- 378 29. Henriques, A. O., Glaser, P., Piggot, P. J. & Moran, C. P., Jr. Control of cell shape and elongation by the rodA gene in
- 379 Bacillus subtilis. *Mol Microbiol* **28**, 235–247 (1998).
- 380 30. Fraipont, C. *et al.* The integral membrane FtsW protein and peptidoglycan synthase PBP3 form a subcomplex in
- 381 Escherichia coli. *Microbiology (Reading, Engl)* **157**, 251–259 (2010).
- 382 31. Harris, L. K. & Theriot, J. A. Relative Rates of Surface and Volume Synthesis Set Bacterial Cell Size. *Cell* **165**, 1479–1492
- 383 (2016).
- 384 32. Taheri-Araghi, S. *et al.* Cell-Size Control and Homeostasis in Bacteria. *Curr Biol* **27**, 1392 (2017).
- 385 33. Zheng, H. *et al.* Interrogating the Escherichia coli cell cycle by cell dimension perturbations. *Proc Natl Acad Sci USA* **113**,
- 386 15000–15005 (2016).
- 387 34. Murray, T., Popham, D. L. & Setlow, P. Bacillus subtilis cells lacking penicillin-binding protein 1 require increased levels of
- 388 divalent cations for growth. (1998).
- 389 35. Popham, D. L. & Setlow, P. Phenotypes of Bacillus subtilis mutants lacking multiple class A high-molecular-weight
- 390 penicillin-binding proteins. *J Bacteriol* **178**, 2079–2085 (1996).
- 391 36. Emami, K. *et al.* RodA as the missing glycosyltransferase in Bacillus subtilis and antibiotic discovery for the peptidoglycan
- 392 polymerase pathway. *Nat Microbiol* **2**, 16253 (2017).
- 393 37. Billaudeau, C. *et al.* Contrasting mechanisms of growth in two model rod-shaped bacteria. *Nat Comms* **8**, 15370 (2017).
- 394 38. Grimm, J. B. *et al.* A general method to improve fluorophores for live-cell and single-molecule microscopy. *Nat Meth* **12**,
- 395 244–250 (2015).
- 396 39. Oldenbourg, R. Polarized light microscopy: principles and practice. *Cold Spring Harb Protoc* **2013**, (2013).
- 397 40. Probine, M. C. & Preston, R. D. Cell Growth and the Structure and Mechanical Properties of the Wall in Internodal Cells of
- 398 Nitella opacal. Wall structure and growth. *J Exp Bot* **12**, 261–282 (1961).
- 399 41. Abraham, Y. & Elbaum, R. Quantification of microfibril angle in secondary cell walls at subcellular resolution by means of
- 400 polarized light microscopy. *New Phytol* **197**, 1012–1019 (2012).
- 401 42. Baskin, T. I. Anisotropic expansion of the plant cell wall. *Annu Rev Cell Dev Biol* **21**, 203–222 (2005).
- 402 43. Inoué T, S. *Polarization Microscopy. Current protocols in cell biology* **1**, (John Wiley & Sons, Inc., 2001).
- 403 44. Verwer, R. W., Beachey, E. H., Keck, W., Stoub, A. M. & Poldermans, J. E. Oriented fragmentation of Escherichia coli
- 404 sacculi by sonication. *J Bacteriol* **141**, 327–332 (1980).
- 405 45. Gan, L., Chen, S. & Jensen, G. J. Molecular organization of Gram-negative peptidoglycan. *Proc Natl Acad Sci USA* **105**,
- 406 18953–18957 (2008).
- 407 46. Yao, X., Jericho, M., Pink, D. & Beveridge, T. Thickness and elasticity of gram-negative murein sacculi measured by
- 408 atomic force microscopy. *J Bacteriol* (1999).
- 409 47. Cui, L. *et al.* A CRISPRi screen in E. coli reveals sequence-specific toxicity of dCas9. *Nat Comms* **9**, 1912 (2018).
- 410 48. Bratton, B. P., Shaevitz, J. W., Gitai, Z. & Morgenstein, R. M. MreB polymers and curvature localization are enhanced by
- 411 RodZ and predict E. coli's cylindrical uniformity. - PubMed - NCBI. *Nat Comms* **9**, 12510 (2018).
- 412 49. Typas, A., Banzhaf, M., Gross, C. A. & Vollmer, W. From the regulation of peptidoglycan synthesis to bacterial growth and
- 413 morphology. *Nat Rev Microbiol* **10**, 123–136 (2011).
- 414 50. Essential nature of the mreC determinant of Bacillus subtilis. *J Bacteriol* **185**, 4490–4498 (2003).
- 415 51. Leaver, M. & Errington, J. Roles for MreC and MreD proteins in helical growth of the cylindrical cell wall in Bacillus subtilis.
- 416 *Mol Microbiol* **57**, 1196–1209 (2005).
- 417

- 418  
419  
420  
421  
422  
423  
424  
425  
426  
427  
428
52. Fisher, I. C., Shapiro, L. & Theriot, J. A. Mutations in the nucleotide binding pocket of MreB can alter cell curvature and polar morphology in *Caulobacter*. *Mol Microbiol* **81**, 368–394 (2011).
  53. Land, A. D. The requirement for pneumococcal MreC and MreD is relieved by inactivation of the gene encoding PBP1a. *J Bacteriol* **193**, 4166–4179 (2011).
  54. Kawai, Y., Daniel, R. A. & Errington, J. Regulation of cell wall morphogenesis in *Bacillus subtilis* by recruitment of PBP1 to the MreB helix. *Mol Microbiol* **71**, 1131–1144 (2009).
  55. Lai, G. C., Cho, H. & Bernhardt, T. G. The mecillinam resistome reveals a role for peptidoglycan endopeptidases in stimulating cell wall synthesis in *Escherichia coli*. *PLoS Genet* **13**, e1006934 (2017).
  56. Lee, T. K., Meng, K., Shi, H. & Huang, K. C. Single-molecule imaging reveals modulation of cell wall synthesis dynamics in live bacterial cells. *Nat Comms* **7**, 13170 (2016).

429 **Figure 1 – Rod width depends on the relative levels of the widening aPBPs to the thinning**  
 430 **Rod system.**

431 Error bars are SD of the mean.

432 **A. Schematic of the two PG synthetic systems responsible for growth.** The *Rod complex*  
 433 (depicted on the left) polymerizes glycans via the peptidoglycan glycosyltransferase (PGT) activity of  
 434 RodA. These glycans are crosslinked into the sacculus by the transpeptidase (TP) activity of  
 435 PBP2A. *aPBPs* are depicted on the right, containing both PGT and TP activity. *Below* -  
 436 Schematic of each system's *in vivo* motions. Rod complexes move circumferentially around the rod  
 437 as they synthesize PG. In contrast, aPBP synthesis does not appear organized, as they diffuse along  
 438 the membrane, occasionally halting and remaining immobile for 1-3 seconds. Protein names are  
 439 capitalized, gene names italicized.

440 **B. *B. megaterium mreBCD* in *B. subtilis* forms rods close to *B. subtilis* width.** "*B. sub*" indicates  
 441 WT *B. subtilis*. "*B. meg*" indicates *B. megaterium*. Checkered boxes are bMD465 (*amyE::Pxyl-*  
 442 *mreBCD*, *minCD* [*B. mega*]::*erm*, *mreBCD*, *minCD::spec* [*B. mega*]), a *B. subtilis* strain where  
 443 the native *mreBCD* locus is replaced with *B. megaterium mreBCD*, and an additional *B.*  
 444 *megaterium mreBCD* is under xylose control at an ectopic locus. "*B. meg mreBCD*" indicates bMD465  
 445 grown with 1% glucose to repress expression from the additional copy. "*2x B. meg mreBCD*" indicates  
 446 bM465 growth with 30 mM xylose to overexpress *B. megaterium mreBCD* from the additional copy.  
 447 See **Figure S1A** for a zoomed view.

448 **C-F. Titrations of *ponA* and *mreBCD* vs. cell width.** Each strain was grown in the inducer  
 449 concentrations shown below the graph. Mean width is plotted on the left axis. PBP1 and MreB  
 450 relative protein abundances (determined by mass spectrometry and normalized to the levels in WT  
 451 Py79 grown in CH) are plotted on the right axis. Arrowhead indicates inductions producing WT  
 452 widths and cellular levels of induced protein. Dashed line depicts mean steady state diameter of  
 453 Py79 in CH, with SD shown as gray shaded area.

454 **C. Cell diameter decreases with *mreBCD* induction.** All data are from strain bMD545 (*amyE::Pxyl-mreBCD::erm*  
 455  $\Delta$ *mreBCD::spec*), except for the induction marked \* which are bMK355 (*amyE::Pxyl-mreBCD::erm*) containing a xylose-inducible  
 456 *mreBCD* in addition to the native *mreBCD*. *Right* – Zoomed view of the right two bars compared to WT. P-value calculated with  
 457 Mann-Whitney.

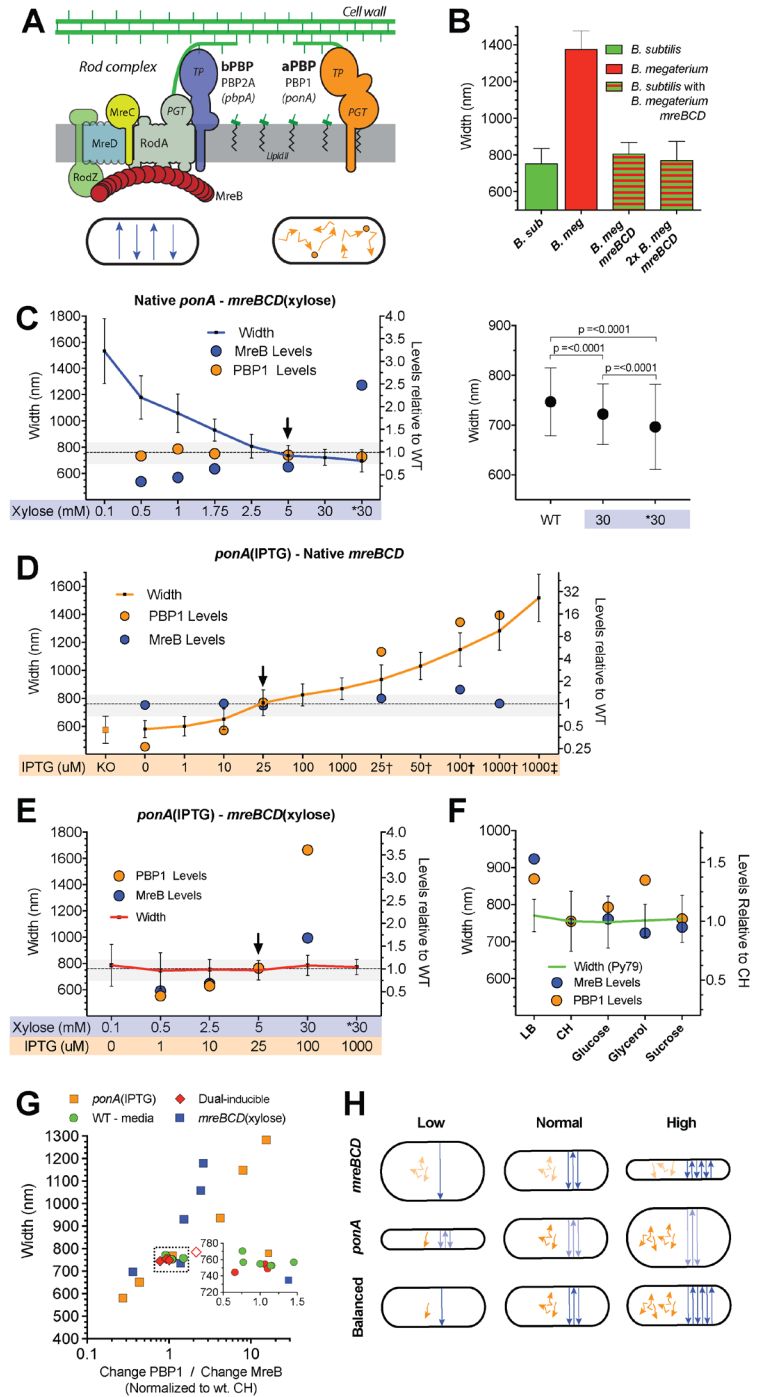

483 **D. Cell diameter increases with *ponA* induction.** All data are from strain bMD598 (*yhdG::Pspank-ponA::cat ΔponA::kan*), except  
 484 for the inductions marked † and ‡ which are under stronger promoters than bMD598. † is bMD586 (*yhdG::Phyperspank-ponA::cat*  
 485 *ΔponA::kan*), and ‡ is bMD554 (*yhdG::Phyperspank-ponA::cat*) which has an inducible *ponA* in addition to the native copy.  
 486

487 **E. A balanced expression of both PG synthetic systems yields normal width rods across a large range.**  
 488 Strain bMD620 (*amyE::Pxyl-mreBCD::erm ΔmreBCD::spec yhdH::Pspank-ponA::cat ΔponA::kan*) grown in combinations of  
 489 inducers shown along the bottom. \* indicates bMD622 (*amyE::Pxyl-mreBCD::erm yhdH::Pspank-ponA::cat ΔponA::kan*) containing  
 490 a xylose-inducible *mreBCD* in addition to the native *mreBCD*.  
 491

492 **F. *B. subtilis* maintains a constant width in different media.** Mean and SD of cell diameters of *B. subtilis* strain Py79  
 493 (exponential phase) grown in different growth media (media where a carbon source is indicated is S750). Width is plotted on the  
 494 left axis. PBP1 and MreB relative protein abundances (determined by mass spectrometry, normalized to the levels in CH media)  
 495 are plotted on the right axis.  
 496

497 **G. WT width is maintained within a narrow range of relative PBP1/MreB ratios.** Plotted are the widths of all cells in Figures  
 498 1C-F, against the ratio of the fold change in PBP1 to that of MreB. Inset is a zoomed view of the dotted box, showing the widths of  
 499 cells within a 0.5-1.5 PBP1/MreB range. Green indicates ratios in different media. Orange squares indicate ratios in *ponA* inducible  
 500 strains. Blue squares indicate ratios in *mreBCD* inducible strains. Red diamonds indicate ratios in the dual-induction strain, with the  
 501 open red diamond indicating the ratio when protein levels exceeded WT.  
 502

503 **H. Model for how the two PG synthesis systems affect rod width.** *Top* – As the amount of circumferentially organized  
 504 synthesis increases (blue straight lines), cell diameter decreases. *Center* – In contrast, as the level of unorganized synthesis  
 505 increases (orange, non-directed lines), so too does cell diameter. *Bottom* – As long as the activities of the unorganized (orange)  
 506 and circumferentially organized (blue) syntheses are balanced, cell width can remain constant, even across a range of protein  
 507 levels.  
 508

509 **Figure 2 – Effects of RodA/PBP2 on cell width, and how each PG synthetic system affects**  
 510 **growth.**  
 511

512 **A. As *rodA* or *pbpA* induction is**  
 513 **increased, the mean diameter of cells**  
 514 **decreases up to a point, beyond which**  
 515 **it increases with rising *rodA* induction,**  
 516 **but not for *pbpA*.** Green line represents  
 517 diameters of bMD592 (*Pxyl-rodA::erm*) at  
 518 five different xylose concentrations, save  
 519 bMD580 (*yhdG::Phyperspank-rodA::cat*  
 520 *ΔrodA::kan*) and bMD556  
 521 (*yhdG::Phyperspank-rodA::cat* - labeled †)  
 522 which were induced with IPTG. Orange  
 523 line represents the diameters of bMD597  
 524 (*Pxyl-pbpA::erm ΔpbpH::spec*) at five  
 525 different xylose concentrations, save  
 526 bMD574 (*yhdG::Phyperspank-pbpA::cat*  
 527 *ΔpbpA::erm ΔpbpH::spec*) and bMD573  
 528 (*yhdG::Phyperspank-pbpA::cat*  
 529 *ΔpbpH::spec* - labeled †) which were  
 530 induced with IPTG.  
 531

532 **B. Overexpression of *rodA* increases cell diameter, but only when *pbpA* expression is also sufficiently high.** Light green  
 533 bars represent the steady state diameter of bMD627 (*Pxyl-rodA::erm ΔpbpH::spec*) induced at the specified concentrations of  
 534 xylose. Green + orange striped bars represent the steady state diameter of bMD631 (*Pxyl-rodA::erm yhdG::Pspank-pbpA::phleo*  
 535 *ΔpbpH::spec*) induced at the specified concentrations of xylose and IPTG.  
 536  
 537

538 **C. The increase in cell diameter caused by overexpression of *rodA* is reduced by simultaneous overexpression of**

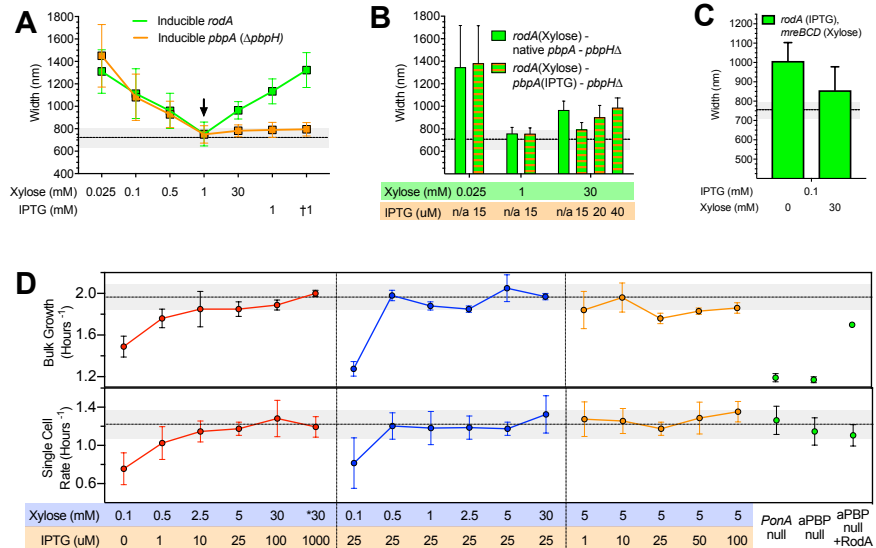



538 *mreBCD*. bMD557 (*yhdG::Phyperspank-rodA::cat amyE::Pxyl-mreBCD::erm*) was induced at the indicated levels of IPTG and  
 539 xylose.

540  
 541 **D. Rates of cell growth measured at the population (Top) and single cell (Bottom) level.** Mean rates of cell growth were  
 542 measured either by (Top) optical density at 600 nm in a shaking plate reader in CH, or (Bottom) by microscopically assaying the  
 543 rate single cells (grown under an agar CH pad) added surface area. All measures are from bMD620 grown in the inducer  
 544 concentrations indicated along the bottom, with the exception of: “*ponA* null”, which is bMK005 ( $\Delta$ *ponA::cat*), “aPBP null”, which is  
 545 bAM268 ( $\Delta$ *pbpF*,  $\Delta$ *pbpG*,  $\Delta$ *pbpD*,  $\Delta$ *ponA::kan*), and “aPBP Null + RodA”, which is bAM288 ( $\Delta$ *pbpF*  $\Delta$ *pbpG*  $\Delta$ *pbpD*  $\Delta$ *ponA::kan*  
 546 *amyE::Phyperspank-rodA-His10::spec*), where RodA is induced with 0.05 mM IPTG. Dotted horizontal lines represent the mean  
 547 growth rate of Py79 in CH medium, with the shaded area representing the SD.

548  
 549 **Figure 3 – Increased *mreBCD* increases directional MreB filament density and the fraction  
 550 of directional PBP2A molecules.**

551 **A. Schematic of the method to quantitate directionally moving MreB filaments.** Data shown is from simulated TIRFM time-  
 552 lapses, with a 1 sec exposure time and  
 553 65 nm/pixel magnification. First, a  
 554 kymograph is generated for each row  
 555 of pixels along the midline of the cell.  
 556 These kymographs are then lined up  
 557 side by side to generate a single 2D  
 558 image, where each column of the  
 559 image contains a kymograph of each  
 560 sequential row of pixels in the cell. This  
 561 image is adaptively thresholded, then  
 562 segmented with contour analysis to  
 563 extract all fluorescent objects (middle).  
 564 These objects are used to get velocity  
 565 (slope), time (centroid), and position  
 566 (row) for each particle. As each particle  
 567 will show similar intensities in adjacent  
 568 rows, or sometimes move at an angle,  
 569 objects up to two rows apart are  
 570 grouped based on time, position, and  
 571 velocity. This yields the final particle  
 572 count (bottom). See **Figure S3** for  
 573 further details and tests.

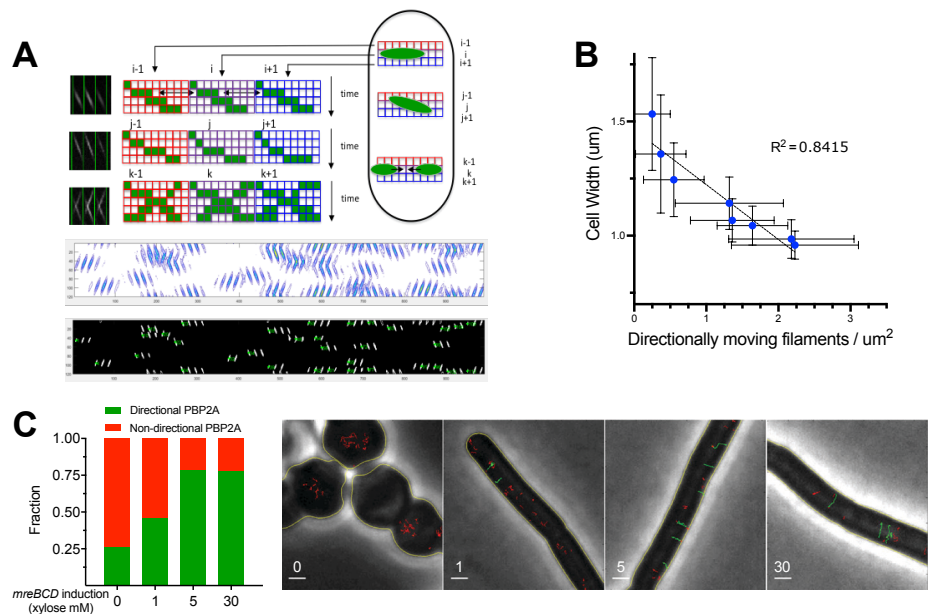

574  
 575 **B. The decreased rod width caused by increasing *mreBCD* induction correlates with an increasing density of directionally  
 576 moving MreB filaments.** bYS981 (*amyE::Pxyl-mreB-SW-msfGFP, mreCD::erm*  $\Delta$ *mreBCD::spec*) was grown in different amounts  
 577 of xylose. Plotted are the steady state mean cell widths against the density of directionally moving filaments (determined as in **A**,  
 578 above). All error bars are SD of the mean.

581 **C. The fraction of directionally moving Halo-PBP2A molecules increases with *mreBCD* expression.** *mreBCD* was induced at  
 582 the indicated levels in bMK385 (*amyE::Pxyl-mreBCD::erm*  $\Delta$ *mreBCD::spec HaloTag-11aa-pbpA::cat*), and the single molecule  
 583 motions of JF-549-labeled Halo-PBP2A were imaged by TIRFM using 300 msec continuous exposures. Plotted are the fractions of  
 584 labeled PBP2A trajectories over 7 frames in length that moved directionally. *Right* - Representative montage of Halo-PBP2A  
 585 trajectories at different levels of *mreBCD* inductions overlaid on phase images. Directionally moving tracks are labeled green; all  
 586 other tracks are labeled red. Scale bar is 1  $\mu$ m. See also corresponding **Movie S3**.

587  
 588

589 **Figure 4 - Increased Rod activity increases both the amount of oriented material within**  
 590 **sacculi and their mechanical anisotropy.**

591 All error bars are SD of the mean.

592 **A. Polarization microscopy reveals oriented material within the cell wall.** *Left* - LC-PolScope  
 593 images of purified WT Py79 sacculi. Focused at the surface, the cell wall  
 594 is seen to be birefringent. Color indicates the orientation of the slow  
 595 axis, with intensity corresponding to retardance in that direction.  
 596 Orientation key is the color wheel at upper left. *Right* - Polarization  
 597 orientation view of the sacculi surface, with lines pointing in the  
 598 predominant orientation of the slow axis. See also **Movie S2**.

599 **B. Induction conditions used to assay sacculi properties.** bMD620  
 600 (*amyE::Pxyl-mreBCD::erm*  
 601  $\Delta$ *mreBCD::spec yhdG::Pspank-ponA::cat*  
 602  $\Delta$ *ponA::kan*) was induced to grow at 3  
 603 different widths: Skinny (30 mM  
 604 xylose, 1  $\mu$ M IPTG), Normal (5 mM  
 605 xylose, 25  $\mu$ M IPTG), and Wide (0.5  
 606 mM xylose, 100  $\mu$ M IPTG).

607 **C. Example LC-PolScope image of bMD620 sacculi induced at different widths.** For each experiment, pairs  
 608 of purified sacculi ("Wide" and  
 609 "Normal", or "Wide" and "Skinny")  
 610 were combined, and Z-stacks were  
 611 collected in 100 nm steps. See also **Movie S3**.

612 **D. The amount of oriented material in the cell wall increases with *mreBCD* induction, and inversely correlates with rod  
 613 width.** Plotted is the mean retardance vs. width along the length of projected Z-stacks of at least 90 different cells for each  
 614 induction condition.

615 **E. Mean retardance for each sample normalized to the thickness of the cell wall, as measured by TEM.**

616 **F. Schematic of osmotic shock assay of anisotropy.** *B. subtilis* sacculi are normally under tension due to the high internal turgor  
 617 (black arrows). Hyperosmotic shock negates this pressure, allowing observation of how sacculi shrink in length and width (colored  
 618 arrows).

619 **G. Example FDAA-labeled cells from each condition (left to right: Skinny, Normal, Wide) before and after osmotic shock.** Scale bar  
 620 is 1  $\mu$ m.

621 **H. As the relative amount of Rod system activity increases, so does the mechanical anisotropy of the sacculus.** Anisotropy  
 622 (% change in length / % change in width) for each induction condition following osmotic shock. Raw data and reduction for each  
 623 dimension (both absolute and percent) are in **Figure S4**.

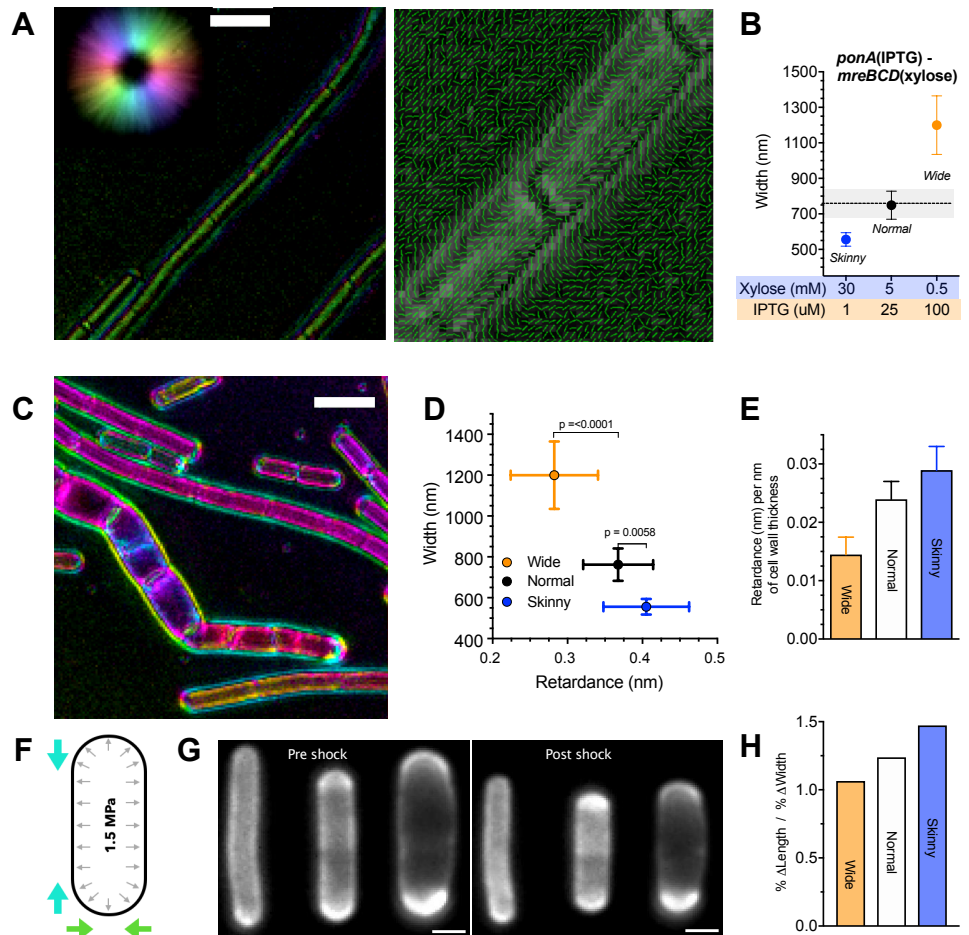

644  
645

**Figure 5 – Directional MreB filament density also correlates with cell width of *E. coli* Rod mutants, suggesting a generalizable model for the effects of Rod complex on cell width.**

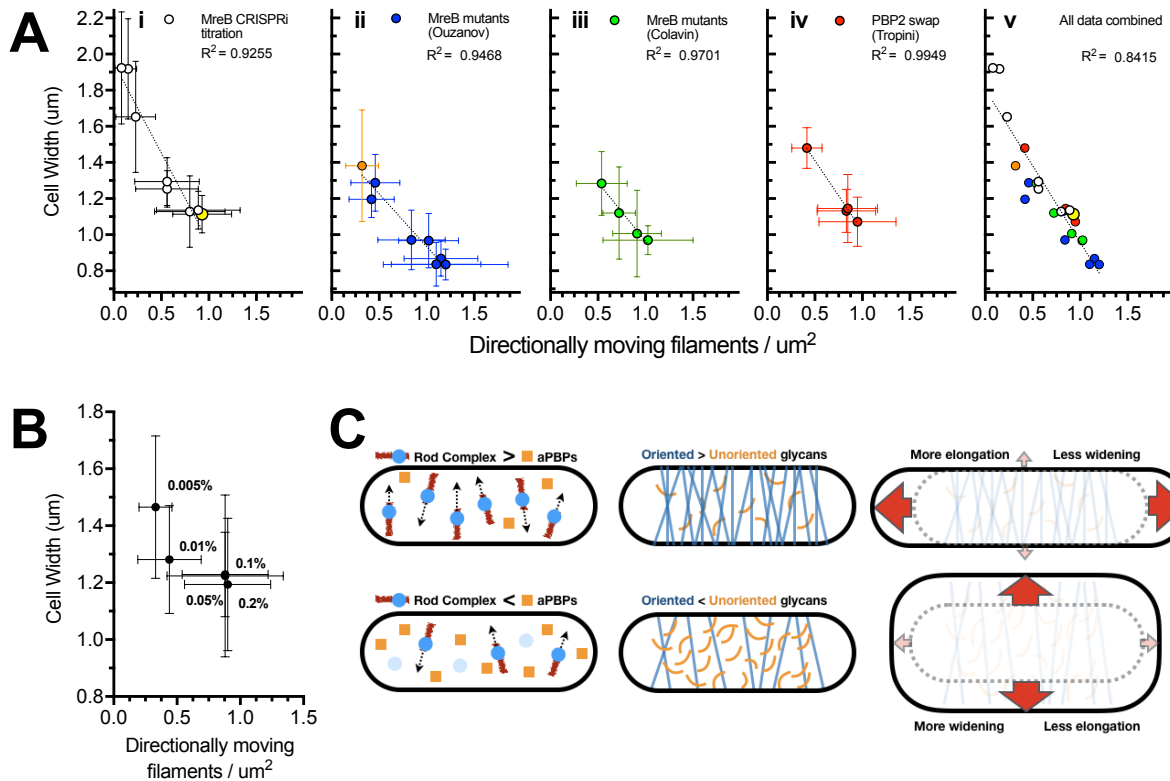

646  
647  
648  
649  
650  
651  
652  
653  
654  
655  
656  
657  
658  
659  
660  
661  
662  
663  
664  
665

**A. Cell width vs. density of directionally moving MreB filaments in different *E. coli* strains.** (i) AV88 ( $186::P_{tet}-dCas9, mreB::msfGFP-mreBsw$ ), allows the tunable expression of *mreB-msfGFPsw* by expressing various sgRNAs with different matches against *msfGFP*. Yellow indicates WT expression. (ii) *mreB-SW-msfGFP* mutant strains from Ouzanov et al., 2016. Orange indicates RM478 ( $\Delta rodZ, mreB(S14A)-msfGFPsw$ ) from Morgenstein et al., 2015. (iii) *mreB-msfGFPsw* mutants believed to change filament curvature from Colavin et al., 2018. (iv) *msfGFP-mreB* strains from Tropini et al., 2015, where *mrDA* is replaced with *mrDA* from other species. (v) All data from (i)-(iv) combined. See also **Movie SM4**. All values are detailed in **Table S1**.

**B. Decreased cell width caused by increased RodZ expression correlates with an increased density of directionally moving MreB filaments.** KC717 ( $csrD::kan, mreB::msfGFP-mreB, ProdZ \llcorner (ftr araC PBAD)$ ) was grown at different arabinose concentrations (indicated on the graph), and filament density was calculated as in **Figure 3B**. See also **Movie SM5**.

**C. Model for how the balance between aPBPs and the Rod system affects cell width.** *Left* – When Rod complex activity (perhaps set by the number of MreB filaments) is high relative to that of aPBPs, sacculi have more circumferentially oriented material (*Center*) compared to when aPBP activity is greater. *Right* – As the amount of oriented material increases, the less elastic sacculi are more rigid across their width, but less rigid along their length. Being stretched by the internal turgor pressure, sacculi with greater Rod activity are better able to maintain their width, while stretching more along their length. In contrast, cells with reduced Rod activity have less circumferentially oriented glycans to reinforce their width, and thus expand more along their width.

666 **Supplemental Material for:**

667

668 **Cell Diameter in *Bacillus subtilis* is Determined by the Opposing Actions of Two Distinct**  
669 **Cell Wall Synthetic Systems**

670

671 Michael F. Dion<sup>1,2,8</sup>, Mrinal Kapoor<sup>1,2,8</sup>, Yingjie Sun<sup>1,2,8</sup>, Sean Wilson<sup>1,2</sup> Joel Ryan<sup>3,4</sup>, Antoine Vigouroux<sup>5,6</sup>,  
672 Sven van Teeffelen<sup>5</sup>, Rudolf Oldenbourg<sup>7</sup>, and Ethan C. Garner<sup>1,2,4\*</sup>

673

674

<sup>1</sup> Department of Molecular and Cellular Biology, Harvard University, Cambridge, United States.

675

<sup>2</sup> Center for Systems Biology, Harvard University, Cambridge, United States.

676

<sup>3</sup> Department of Biology II, Ludwig-Maximilians-Universität München, Martinsried, Germany

677

<sup>4</sup> Physiology Course, Marine Biological Laboratory, Woods Hole, USA.

678

<sup>5</sup> Synthetic Biology Laboratory, Institut Pasteur, Paris, France.

679

<sup>6</sup> Microbial Morphogenesis and Growth Laboratory, Institut Pasteur, Paris, France.

680

<sup>7</sup> Marine Biological Laboratory, Bell Center, Woods Hole, United States

681

<sup>8</sup> These authors contributed equally to this work.

682

Corresponding Author: Ethan C. Garner

683

NW 445.20, Northwest Building, 52 Oxford Street, Cambridge, MA 02138

684

\*E-mail: [egarner@g.harvard.edu](mailto:egarner@g.harvard.edu)

685

686

687

688

689

690  
691  
692

## Supplemental figures.

### Figure S1

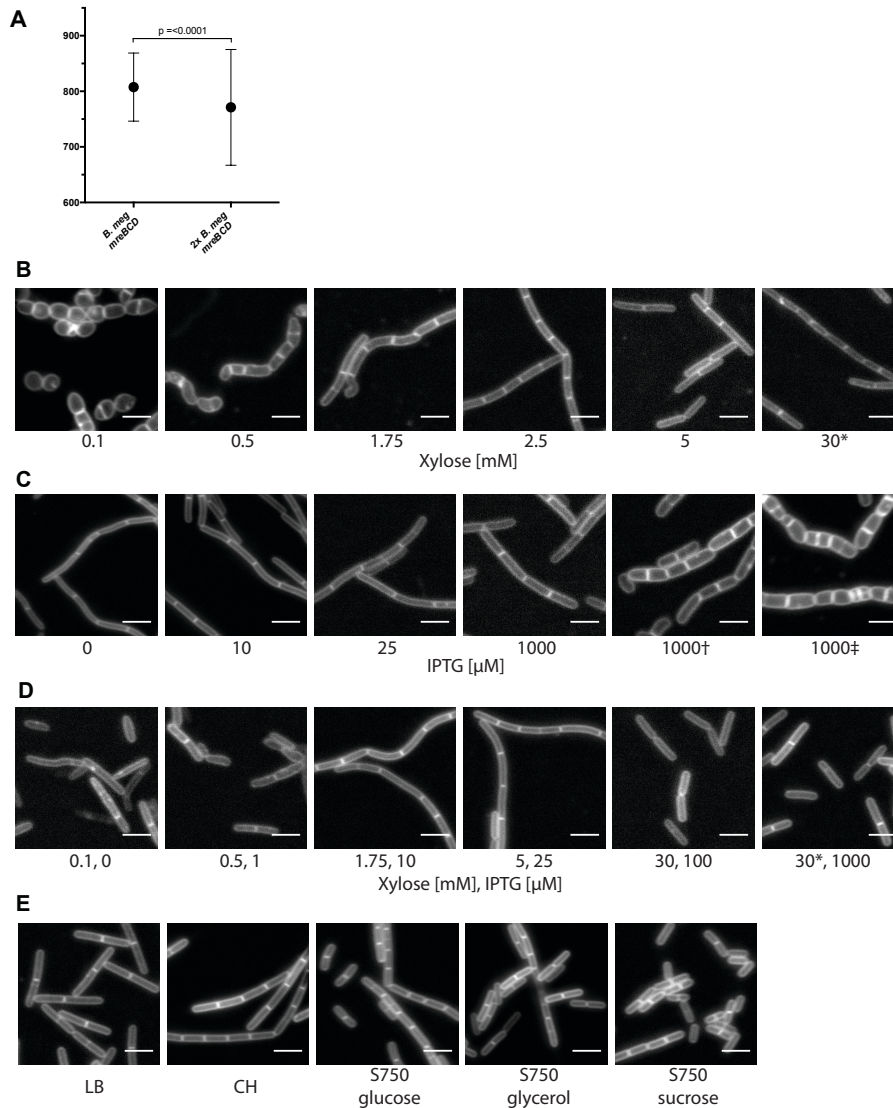

693  
694  
695  
696  
697  
698  
699  
700  
701  
702  
703  
704  
705  
706  
707  
708  
709

**A.** Zoomed view of the two rightmost distributions of widths in **Figure 1B**. Error bars are SD of the mean.

**B-D.** Cells were grown in CH media with the indicated concentrations of inducers during steady state growth, then stained with 0.5 μg/mL FM 5-95. Scale bars are 4 μm.

**B.** Images are of bMD545 (*amyE::Pxyl-mreBCD::erm*,  $\Delta$ *mreBCD::spec*), save the induction annotated \* which is bMK355 (*amyE::Pxyl-mreBCD::erm*), containing a xylose inducible *mreBCD* in addition to the native *mreBCD*.

**C.** Images are of bMD598 (*yhdG::Pspank-ponA::cat*,  $\Delta$ *ponA::kan*), induced with the indicated amounts of IPTG, save the inductions marked † and ‡ which are under stronger promoters than bMD598; † is bMD586 (*yhdG::Phyperspank-ponA::cat*,  $\Delta$ *ponA::kan*), and ‡ is bMD554 (*yhdG::Phyperspank-ponA::cat*), containing an inducible *ponA* in addition to the native copy.

**D.** Images of bMD620 (*amyE::Pxyl-mreBCD::erm*,  $\Delta$ *mreBCD::spec*, *yhdH::Pspank-ponA::cat*,  $\Delta$ *ponA::kan*) grown in CH, and induced with the indicated amounts of IPTG and xylose. The image annotated \* indicates bMD622 (*amyE::Pxyl-mreBCD::erm* *yhdH::Pspank-ponA::cat*  $\Delta$ *ponA::kan*) containing a xylose-inducible *mreBCD* in addition to the native *mreBCD*.

710 E. Representative images of Py79 grown in indicated media, then stained with 0.5  $\mu\text{g}/\text{mL}$  FM 5-95. Scale bars are 4  $\mu\text{m}$ .

711

712 **Figure S3**

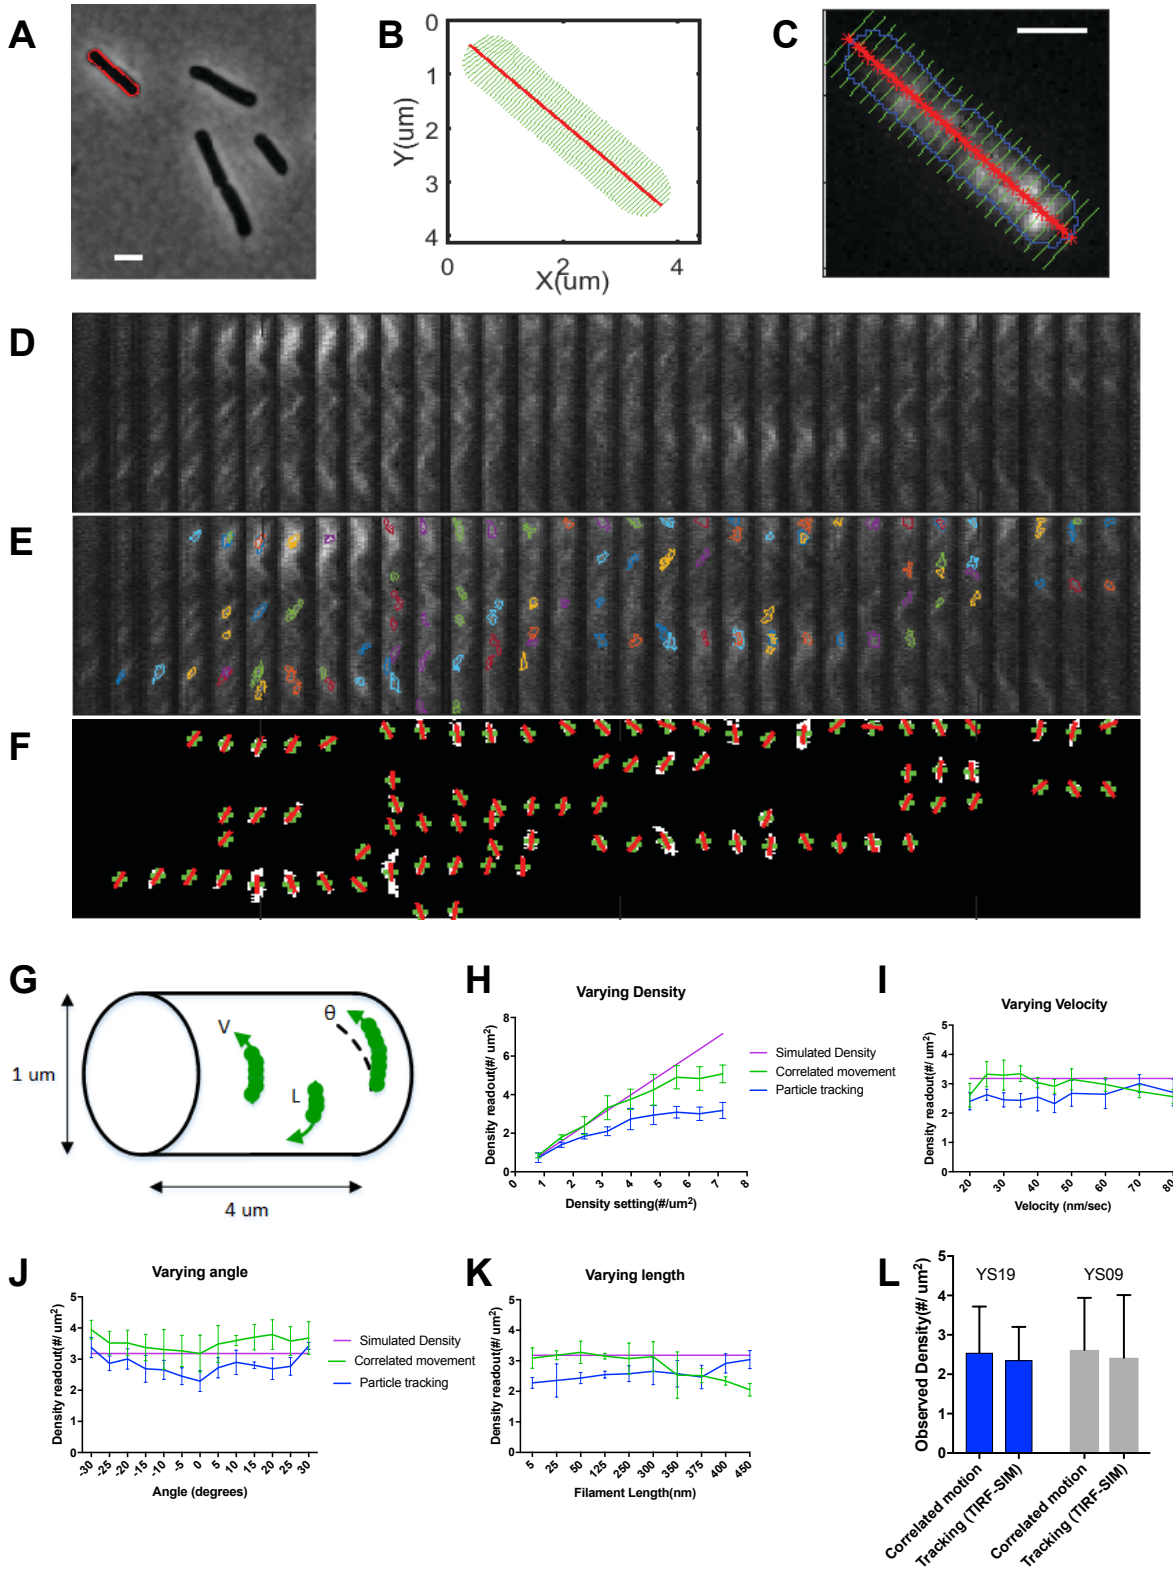

713

714 **A-F. Expanded description of the method used to determine directional filament density.** Cells expressing fluorescent MreB  
715 fusions were imaged with TIRF for 120 seconds, followed by a single image in phase-contrast. From the phase-contrast images  
716 ((**A**) - scale bar is 2  $\mu\text{m}$ ), cells were segmented to determine their dimensions and midline (**B**). The resulting segmentation mask  
717 was used to create kymographs out of the fluorescence time-lapse data. (**C**) Shows the mask overlaid on a maximum intensity  
718 projection of a TIRF time-lapse (red line indicates midline, green lines are the axis along which kymographs are drawn, scale bar is  
719 2  $\mu\text{m}$ ). Next, kymographs were created for each sequential row of pixels along the midline, and the kymographs from each row  
720 were displayed side by side as in (**D**). Next, objects within these kymographs were identified and segmented based on contour  
721 analysis (**E**), using adaptive thresholding. For each identified object, a set of properties [ $X$ ,  $t$ ,  $v$ ,  $I$ ] were measured. ( $X$ ,  $t$ ) are the  
722 centroid of the object in the binary image (green crosses in (**F**)).  $X$  is the position of the filament along the cell width, and  $t$  is time,  
723 corresponding to rows in the kymographs. Velocity ( $v$ ) is calculated based on the diagonal slope of the object in the binary image  
724 (red lines in (**E**)), and can be positive or negative depending on the direction of motion. Intensity ( $I$ ) is the sum of the intensities of  
725 all pixels in the object. Because each kymograph represents one row of pixels in the cell, and the signal from each particle can  
726 span more than one pixel (65 nm) in width, the same filament can appear in several sequential kymographs (or rows in the original  
727 image). In order to link the objects occurring in multiple rows together, each object in a given row [ $X_i$ ] can be linked to  
728 corresponding objects in the next row [ $X_{i+1}$ ] or previous row [ $X_{i-1}$ ] based on their time and velocity. Objects are only linked if they  
729 have a velocity  $v \pm 20$  nm/sec of each other, and their peak time  $t$  is within 2 seconds; these objects are then counted as a single  
730 filament. This also allows us to capture filaments moving at angles of up to  $\pm 30$  degrees to the midline. Finally, the number of  
731 counts occurring during the imaging interval is normalized based on the cell width and length (or total surface area  $\pi \times \text{width} \times \text{length}$ ).  
732

733 **G-J. Evaluation of filament density quantitation tested using simulations.**  
734 (**G**) Schematic of the MreB data simulations. Simulations were run using custom MATLAB code, with the following parameters:  
735 Maximum fluorescence intensity was 300 counts and noise was 10 (approximating the signal to noise conditions in our imaging).  
736 The simulated cell had a width of 1  $\mu\text{m}$  and a length of 4  $\mu\text{m}$ . We tested the robustness of our tracking by varying one parameter  
737 while the others were fixed at the following values: Filament density was  $3.2/\mu\text{m}^2$  (corresponding to 40 MreB filaments per cell),  
738 filament velocity was 30 nm/sec, filament orientation was 0 degrees, and filament length was 250 nm. This data was tracked using  
739 the correlated motion method detailed above. For comparison, we tracked the same simulated data with the linear motion LAP  
740 tracker in Trackmate, with a low bar for calling a trace a directional motion (tracks longer than 6 frames with a displacement greater  
741 than 250 nm). (**H**) Filament detection performance with respect to different filament density settings (from 0.8 to  $7.2/\mu\text{m}^2$ ,  
742 corresponding to 10 - 90 MreB filaments per cell). (**I**) Filament detection with respect to filament angles (from -30 to 30 degrees).  
743 (**J**) Filament detection with respect to different filament velocities (from 20 to 90 nm/sec). (**K**) Filament detection with respect to  
744 different filament lengths (5 nm to 450 nm).  
745

746 **L. Correlated motion analysis yields a similar density of directional filaments as tracking of MreB filaments imaged by**  
747 **TIRF-SIM.** For this comparison, two different strains with natively expressed MreB fusions, YS09 (*mreB-mNeonGreen*) and YS19  
748 (*mreB-SW-msfGFP*), were grown under the same conditions, and were analysed using two different imaging/analysis pipelines: 1)  
749 As above, standard TIRFM imaging followed by correlated motion analysis, and 2) TIRF-SIM imaging, followed by tracking  
750 filaments with particle tracking (using the same settings as in (**G**) above).  
751  
752  
753

754 **Figure S4**

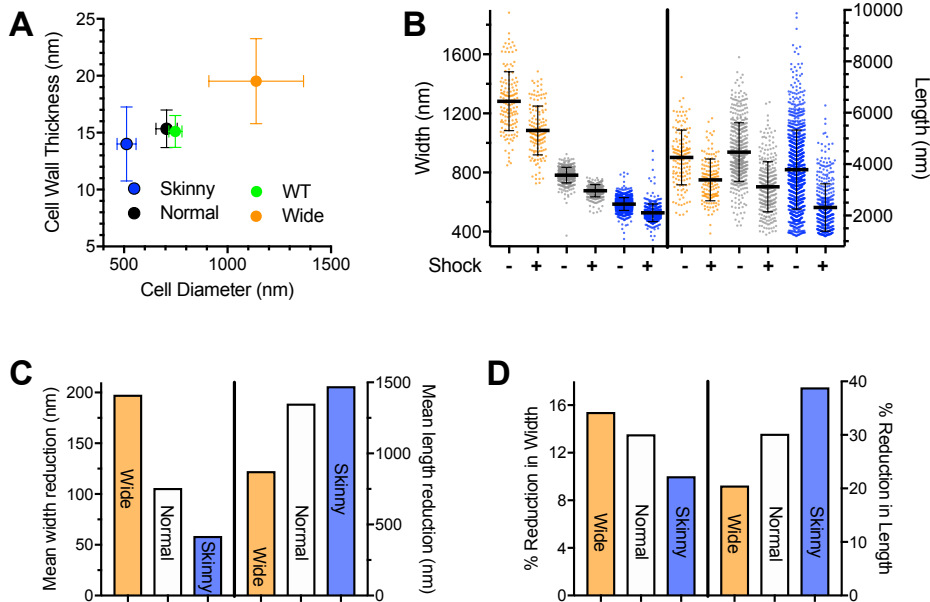

755  
756  
757  
758  
759  
760  
761  
762  
763  
764  
765  
766

**A.** Cells, induced under identical conditions to **Figure 4B**, were fixed and stained with uranyl acetate, the block was cut in ultrathin sections, then imaged with transmission electron microscopy (TEM). The thickness of the cell wall was measured and plotted against cell diameter (also determined via TEM).

**B.** All data of the width (left) and length (right) of cells before and after osmotic shocks (orange = Wide, grey = Normal, blue = Skinny). Error bars are SD of the mean.

**C** Absolute and **D** percent reduction in width and length of labeled sacculi under each induction condition after osmotic shock.

767 **Supplemental Movie Legends.**

768  
769  
770  
771  
772  
773  
774  
775  
776  
777  
778  
779  
780  
781  
782  
783  
784  
785  
786  
787

**Movie S1** – Example single molecule movies of PBP2A-HaloTag (labeled with JF549<sup>1</sup>) at different *mreBCD* induction levels in bMK385 (*amyE::Pxyl-mreBCD::erm, ΔmreBCD, HaloTag-11aa-pbpA::cat*). Xylose concentrations are indicated in each panel. Frames are 300 msec apart.

**Movie S2** – Z-stack of LC-PolScope images of sacculi purified from wild type Py79. (Left) Z-stack of the retardance of each plane. (Right) Color map of birefringence at each plane, with color wheel at upper left giving orientation reference. Z-steps were taken in 100 nm increments.

**Movie S3** – Z-stack color map of birefringence of sacculi purified from strain bMD620 (*amyE::Pxyl-mreBCD::erm, ΔmreBCD, yhdG::Pspank-ponA::cat, ΔponA::kan*), where cells were induced to “Wide” (0.5 mM xylose, 0.1 mM IPTG) and “Normal” widths (5 mM xylose, 0.025 mM IPTG). Color wheel at upper left indicates orientation direction. Z-steps were taken in 100 nm increments.

**Movie S4** – TIRF-SIM movies of different *mreB*-SW-*msfGFP* mutants. Cells were grown in LB at 37°C, then placed under an LB agar and imaged at 37°C. Frames are 1 sec apart. Scale bars are 1 μm.

**Movie S5** – TIRF-SIM movies of strain KC717 (*mreB::msfGFP-mreB, ProdZ<math>\Delta</math>(ftr araC PBAD)*). Cells were grown for 5 hours in LB with the indicated arabinose concentrations, were placed under an LB agar pad and imaged at 37°C. Frames are 1 sec apart. Scale bars are 1 μm.



788

## Materials and Methods.

789

### Media and culture conditions

790

For all experiments, unless otherwise noted, *B. subtilis* and *B. megaterium* were grown in casein hydrolysate (CH) medium (where indicated, xylose and/or isopropyl thiogalactoside (IPTG) was added), and *E. coli* strains were grown in lysogeny broth (LB) medium (where indicated, arabinose or anhydrotetracycline (ATc) was added), at 37°C with rotation. When pre-cultures reached exponential phase the next day, after overnight growth at 25°C, they were further diluted into fresh growth medium (and where indicated, with the specified concentrations of inducer) and were grown for at least 3 hours at 37°C with rotation, to an OD<sub>600</sub> of ~0.3 to 0.7.

796

797

### Sacculi purification

798

20 mL cultures were grown in 250 mL baffled flasks at 37°C with vigorous shaking, to an OD<sub>600</sub> of ~0.5, were harvested and were centrifuged at 5,000 × *g* for 5 min at 4°C. Cell pellets were resuspended in 1 mL of ice-cold phosphate buffered saline (PBS), were centrifuged at 6,000 × *g* for 30 sec, were resuspended in 500 μL of PBS, and were killed by boiling in a water bath for 10 min. Cells were centrifuged at 6,000 × *g* for 2 min, were resuspended in 500 μL of PBS containing 5% sodium dodecyl sulfate (SDS), and were boiled in a water bath for 25 min; this was repeated once, except boiling was for 15 min. To remove the SDS, the samples were centrifuged at 6,000 × *g* for 2 min, and were resuspended in 500 μL of PBS; this was repeated 5 times. The cells were centrifuged at 6,000 × *g* for 2 min, were resuspended in 1 mL of 50 mM Tris-HCl, pH 7.5, containing 10 mM NaCl, and 2 mg of pronase from *Streptomyces griseus* (MilliporeSigma, MA), and were incubated at 60°C for 90 min with gentle shaking. To remove the pronase, the samples were boiled twice in PBS/5% SDS, followed by 6 rounds of washes in PBS, exactly as described in the steps above that precede the pronase treatment. The samples were centrifuged at 6,000 × *g* for 2 min, were resuspended in 1 mL of 25 mM Tris-HCl, pH 8.5, containing 0.5 M NaCl, 5 mM MgCl<sub>2</sub>, and 100 U of salt-active nuclease (SAN) (ArticZymes, Norway), and were incubated at 4°C overnight with gentle mixing. To remove the SAN, the samples were boiled twice in PBS/5% SDS, followed by 6 rounds of washes in PBS, exactly as described in the steps above that precede the pronase treatment. The sacculi were centrifuged at 6,000 × *g* for 2 min, the supernatant was removed, and the pellets were stored at -80°C.

814

815

### Polarization microscopy

816

Purified sacculi were resuspended in PBS and placed on ethanol-cleaned No. 1.5 coverslips under a cleaned glass slide. Polarization images were acquired on an inverted LC-PolScope mounted on a Nikon Ti-E equipped with a 60x/1.4NA Plan Apo oil immersion objective and oil condenser with matching NA, and a Hamamatsu Photonics Flash4 camera. Z-stacks in 100 nm steps were taken of each sample using 50 msec acquisitions of 546/12 nm light. All image acquisition, processing, and display, including colored display and line maps were prepared using the OpenPolScope Hardware Kit and plugins for ImageJ/Micro-Manager from OpenPolScope.org.

822

823

### Calculation of retardance

824

Z-stacks of the computed total retardance for each slice were exported from OpenPolScope. These stacks were cropped at one frame above and beneath the focal planes of the top and the bottom of the cells, then projected into a single plane using ImageJ. To avoid getting high retardance values from the edge effects arising from the sides of the cell or the septa, we selected the retardance at the middle of the cell, using the average of line scans (5 pixels long and 3 wide) that were drawn down the center of cells, taking care to avoid edges and septa.

829

830

### Transmission electron microscopy of cell wall thickness

831

Overnight cultures were diluted into fresh medium and grown to an OD<sub>600</sub> of ~0.3 to 0.5. Cells were pelleted by centrifugation at 5,000 × *g* and fixed by resuspending in 100 mM MOPS pH 7 containing 2% paraformaldehyde, 2.5% glutaraldehyde, and 1% DMSO overnight at 4°C. Cells were centrifuged at 5,000 × *g* and were washed 3 times with 100 mM MOPS pH 7. The pellet was stained with 2% osmium tetroxide in 100 mM MOPS for 1 hr, washed twice with deionized water, and stained overnight with 2% uranyl acetate. The pellet was washed twice with deionized water and dehydrated by washing once with 50% ethanol, once with 70% ethanol, once with 95% ethanol, and then three times with 100% (v/v) ethanol. Samples were prepared for resin infiltration by washing once with 50% ethanol, 50% propylene oxide (v/v) and then once with 100% propylene oxide. All wash steps were for 5 min. Infiltration of resin was

838

839 achieved by incubation with 50% Embed 812 (EMS, PA)/50% propylene oxide for 1 hr, followed by incubation with  
840 67% Embed 812/33% propylene oxide for 1hr, and incubation with 80% Embed 812/20% propylene oxide for 1 hr.  
841 Samples were then incubated twice with Embed 812 for 1 hr, followed by an overnight incubation in molds. The molds  
842 were baked at 65°C for 18 hr before sectioning.

843  
844 Serial ultrathin sections (80 nm) were cut with a Diatome diamond knife (EMS, PA) on a Leica Ultracut UCT (Leica  
845 Microsystems, Germany) and collected on 200-mesh thin-bar formvar carbon grids. Sections were imaged on an FEI  
846 Tecnai transmission electron microscope.

847  
848 Cell wall thickness measurements were performed using a custom-built MATLAB (Mathworks, MA) script. Image  
849 intensity profiles extracted from lines were drawn perpendicular to a user-input line defining the middle of the cell wall.  
850 The distance between the two lowest points below a threshold within 40 nm of the middle of the cell wall was  
851 measured as the cell wall thickness at ~30 points in each cell.

### 852 853 **Measurements of cell diameter**

854 Cultures grown to an OD<sub>600</sub> of ~0.3 to 0.7 were stained with 0.5 µg/mL FM 5-95 (Thermo Fisher, MA) for 1 min, and  
855 were concentrated by centrifugation at 6,000 x *g* for 30 sec. The cell pellet was resuspended in ~1/20 volume of  
856 growth medium, and 3 µL was applied to ethanol-cleaned No. 1.5 coverslips under a 3% agarose pad containing  
857 growth medium. Fluorescent cells were imaged with the top surface of the agarose pad exposed to air, in a chamber  
858 heated to 37°C. Epifluorescence microscopy was performed using a Nikon Eclipse Ti equipped with a Nikon Plan Apo  
859 λ 100×/1.4NA objective and an Andor camera. Cell contours and dimensions were calculated using the  
860 Morphometrics software package <sup>2</sup>.

### 861 862 **Measurements of single-cell growth rate**

863 Cultures grown to an OD<sub>600</sub> below 0.3 were concentrated by centrifugation at 6,000 x *g* for 30 sec. The cell pellet was  
864 resuspended in growth medium, and applied to No. 1.5 glass-bottomed dishes (MatTek Corp., MA). All cells were  
865 imaged under a 2% agarose pad containing growth medium, with the top surface exposed to air, in a chamber heated  
866 to 37°C. Phase-contrast microscopy was performed using a Nikon Eclipse Ti equipped with a Nikon Plan Apo λ  
867 100×/1.4NA objective and an Andor camera. We used a custom-built package in MATLAB to perform segmentation  
868 on phase-contrast time-lapse movies, then calculated the growth rate of the surface area of single *B. subtilis* chains.

### 869 870 **Measurements of bulk growth rate**

871 For cell culture measurements of growth rate, overnight cultures were diluted in fresh medium and grown for ~3 hr at  
872 37°C to an OD<sub>600</sub> of ~0.3 to 0.7. The cultures were diluted back to a calculated OD<sub>600</sub> of 0.07 in 100-well microtiter  
873 plates, and their growth rates were measured in a Bioscreen-C Automated Growth Curve Analysis System (Growth  
874 Curves USA, NJ) plate reader, at 37°C with continuous shaking. Growth rates were calculated from OD<sub>600</sub>  
875 measurements that were recorded every 5 min for at least 6 hr.

### 876 877 **TIRF microscopy of Halo-PBP2A**

878 Cultures grown to an OD<sub>600</sub> below 0.3 were labelled with 10 nM JF549 <sup>3</sup>, and were concentrated by centrifugation at  
879 6,000 x *g* for 30 sec. The cell pellet was resuspended in growth medium and applied to ethanol-cleaned No. 1.5  
880 coverslips. All cells were imaged under a 2% agarose pad containing growth medium with the top surface exposed to  
881 air, in a chamber heated to 37°C. TIRFM and phase-contrast microscopy were performed using a Nikon Eclipse Ti  
882 equipped with a Nikon Plan Apo λ 100×/1.45NA objective and a Hamamatsu ORCA-Flash4.0 V2 sCMOS camera.  
883 Fluorescence time-lapse images were collected by continuous acquisition with 300 msec exposures.

### 884 885 **Analysis of the density of MreB**

886 Phase images of bacteria were segmented using Morphometrics <sup>4</sup>, and the width and length of each cell was  
887 calculated. Next, the fluorescence time-lapses were analyzed based on the segmentation mask of the phase image  
888 (**Figure S3C**). Filament counting was performed in several steps (**Figure S3**). First, kymographs were generated for  
889 each row of pixels along the midline of the cell. Next, the kymographs for each row were placed side by side,  
890 converting the TIRF time lapse data into a single 2D image (**Figure S3D**). To identify filaments in the kymograph,  
891 closed contours were generated in the 2D image (**Figure S3E**). We only selected contours within a given size range

892 (0.04  $\mu\text{m}^2$  to 0.17  $\mu\text{m}^2$ ). For these contours, we calculated the total intensity (the sum of the intensities of the pixels in  
893 the contour), the centroid, the velocity (calculated from the slope of the major axis line of the contour) (**Figure S3F**),  
894 and time (from the centroid). Next, to identify cases where the same MreB filament appears in multiple sequential  
895 kymographs, each object in a given kymograph is linked to a corresponding object in the next and previous  
896 kymographs based on the above properties of the object (see **Figure S3F** for details). Finally, the counting is verified  
897 manually by numbering each filament on the 2D image (**Figure 3A**). To test the performance of the filament counting,  
898 we analyzed simulated data with different filament density, velocity, and orientation settings (**Figure S3**). All of the  
899 image analyses were performed using MATLAB.

900

901

### Simulation of directionally moving MreB

902

The Image Correlation Spectroscopy <sup>5</sup> MATLAB package was used for the simulation of MreB moving around the cell.  
903 The following parameters were set for the MreB simulations: velocity, orientation, filament number and filament length.  
904 The default velocity setting is 30 nm/sec and the default orientation is 0, which means MreB moves perpendicular to  
905 the central axis. The default filament length is set to 250 nm and each MreB monomer is assumed to be 5 nm. The  
906 cell width is set to 1  $\mu\text{m}$  and the cell length is set to 4  $\mu\text{m}$ . The pixel size is 65 nm and the time interval is 1 sec, which  
907 is the same as the TIRF imaging obtained with our Nikon Eclipse Ti equipped with a Hamamatsu ORCA-Flash4.0 V2  
908 sCMOS camera. The particles are randomly distributed on the surface of the cell. Each simulation data point was  
909 repeated 5 times for the counting analysis. To compare the correlated motion approach against particle tracking, we  
910 counted the number of tracks observed after tracking the simulated data using the Linear Motion LAP tracker in FIJI <sup>6</sup>  
911 with TrackMate v3.8 <sup>7</sup>. The threshold for spot size was 0.195  $\mu\text{m}$  and the intensity threshold was 10 counts. The  
912 search radius is 0.085  $\mu\text{m}$ , the link radius is 0.085  $\mu\text{m}$ , and the gap size is 1. All traces longer than 6 frames that had  
913 moved more than 250 nm were considered directional motions.

914

915

### TIRF-SIM imaging of *E. coli* strains

916

Cells were prepared as described in “Media and culture conditions”. Cells were placed under an LB agarose pad, on a  
917 cleaned No.1.5 coverslip, and imaged at 37°C. Live-cell SIM data were acquired as described previously <sup>8</sup> on a Zeiss  
918 Axio Observer.Z1 inverted microscope outfitted for structured illumination. An Olympus 100x/1.49NA objective was  
919 used instead of the Zeiss 1.45NA objective because the slightly larger NA of the Olympus objective gives higher  
920 tolerance for placing the excitation beams inside the TIRF annulus. Data was acquired at 1 sec frame rates, with 20  
921 msec exposures from a 488 nm laser for each rotation. TIRF-SIM images were reconstructed as described previously  
922 <sup>8</sup>.

923

924

### TIRF-SIM imaging of *B. subtilis* strains

925

Cells were prepared as described in “Media and culture conditions”. Cells were placed under a CH agarose pad in a  
926 No. 1.5 glass-bottomed dish (MatTek Corp., MA) for imaging. Images were collected on a DeltaVision OMX SR Blaze  
927 system in TIRF mode, using an Edge 5.5 sCMOS camera (PCO AG, Germany) and a 60x objective. 75 msec  
928 exposures from a 488 nm diode laser were used for each rotation. Spherical aberration was minimized using  
929 immersion oil matching. Raw images were reconstructed using SoftWoRx (GE Healthcare, MA) software.

930

931

### Particle tracking of JF549-Halo-PBP2A

932

Particle tracking was performed using the software package FIJI <sup>6</sup> and the TrackMate v3.8 <sup>7</sup> plugin. For calculation of  
933 particle velocity, the scaling exponent  $\alpha$ , and track orientations relative to the midline of the cell, only tracks persisting  
934 for 7 frames or longer were used. Particle velocity for each track was calculated from nonlinear least squares fitting  
935 using the equation  $\text{MSD}(t) = 4Dt + (vt)^2$ , where MSD is mean squared displacement,  $t$  is time interval,  $D$  is the  
936 diffusion coefficient, and  $v$  is speed. The maximum time interval used was 80% of the track length. To filter for  
937 directionally moving tracks, we discarded those with a velocity lower than 0.01 nm/sec. Tracks were also excluded if  
938 the  $R^2$  for log MSD versus log  $t$  was less than 0.95, indicating a poor ability to fit the MSD curve.

939

940

### Osmotic shock experiments

941

Overnight, exponentially growing cultures (as described in “Media and culture conditions”) were diluted into fresh CH  
942 medium, grown at 37°C to an  $\text{OD}_{600}$  of 0.1 to 0.2, then stained by growing in 100  $\mu\text{M}$  Alexa Fluor 488-D-Lysine-NH<sub>2</sub>  
943 for 1 hr. Without washing, cells were then loaded into a CellASIC microfluidic flow cell (MilliporeSigma, MA) pre-  
944 conditioned with media and washed in the chamber via channels 6 and 5. Media in channel 6 was replaced with 5 M

945 NaCl, and the flow cell was resealed and imaged immediately. After collecting images across the whole chip pre-  
946 shock, 5 M NaCl was flowed into the chip via channel 6 and imaged immediately.

947

#### 948 **Alexa Fluor 488-D-Lysine-NH<sub>2</sub>**

949 Alexa Fluor 488-D-Lysine-NH<sub>2</sub> was synthesized as in Lebar et al., 2014. Briefly, Boc-D-Lys(Cbz)-OH (Bachem,  
950 Switzerland) was reacted with carbonyldiimidazole (CDI) (MilliporeSigma, MA) in dimethylformamide (DMF) for 1.5 hr,  
951 then aqueous ammonia was added and stirred for 6 hr to form the carboxamide Boc-D-Lys(Cbz)-NH<sub>2</sub>. The Cbz  
952 protecting group was removed by catalytic hydrogenation (20% Pd(OH)<sub>2</sub>/C) in methanol. The product, Boc-D-Lys-  
953 NH<sub>2</sub>, was reacted with CDI in DMF for 1.5 hr, then Alexa Fluor 488 carboxylic acid in DMF was added and reacted for  
954 6 hr to yield Boc-D-Lys(Alexa Fluor 488)-NH<sub>2</sub>. The Boc protecting group was removed by stirring in neat  
955 trifluoroacetic acid (TFA) for 30 min. The reaction was stopped by dropwise addition of TFA solution to ice-cold ether.  
956 The precipitate was then HPLC-purified to obtain Alexa Fluor 488-D-Lysine-NH<sub>2</sub>.

957

#### 958 **CRISPRi titration of MreB expression**

959 We used complementarity-based CRISPR knockdown to titrate the MreB expression level in *E. coli*. The degree of  
960 MreB-SW-msfGFP repression is controlled by introducing mismatches between the guide RNA and the target DNA<sup>9</sup>.  
961 The repression strength can be tuned by modulating spacer complementarity to msfGFP using different numbers of  
962 mismatches. To repress msfGFP using CRISPR knockdown, we placed the dCas9 cassette under the control of a  
963 Ptet promoter and different plasmids to target msfGFP. We induced dCas9 at a constant high level with 100 ng/ml of  
964 ATc and changed the degree of guide RNA complementarity with different plasmids. For pcrRNA plasmid we use four  
965 different guide RNAs with 10, 11, 14, and 20 bp of complementarity. For pAV20 plasmid we use four different guide  
966 RNAs with 5, 10, 14, and 20 bp of complementarity. The cells were grown and imaged in LB containing 50 ug/ml  
967 kanamycin.

968

#### 969 **Protein extraction and labelling**

970 Cell cultures were grown to an OD<sub>600</sub> of ~0.4 to 0.6 (cell amounts were normalized by harvesting the equivalent of 3  
971 mL of culture at an OD<sub>600</sub> of 0.5). Cells were centrifuged at 6,000 × *g* for 30 sec, washed once in 1 mL of ice-cold 20  
972 mM Tris-HCl, pH 7.5, and 10 mM EDTA (TE), were resuspended in 100 μL of TE, and were killed by boiling in a water  
973 bath for 10 min. All samples were frozen at -80°C overnight (or up to 1 week). Thawed samples were digested with 50  
974 μg of lysozyme (Thermo Fisher, MA) in the presence of 1 mM PMSF, at 37°C for 15 min.

975

976 Protein extraction was achieved utilizing a Covaris S220 ultrasonicator (Covaris, MA), under denaturing conditions  
977 upon the addition of urea-based Protein Extraction Buffer DF (Covaris, MA), followed by ice-cold methanol/chloroform  
978 precipitation. Proteins were digested with trypsin (Promega, WI). Each resulting peptide mixture was labeled with one  
979 of a set of up to eleven isotopic tandem mass tags (TMTs) (Thermo Fisher, MA).

980

#### 981 **Peptide fractionation and mass spectrometry**

982 Equal amounts of each TMT-labelled sample were combined and fractionated by electrostatic repulsion-hydrophobic  
983 interaction chromatography, on an Agilent (Santa Clara, CA) 1200 HPLC system using a PolyWAX LP 200 x 2.1 mm,  
984 5 μm, 300Å column (PolyLC, MD). Peptides were separated across a 70 min gradient from 0% of "buffer A" (90%  
985 acetonitrile, 0.1% acetic acid) to 75% of "buffer B" (30% acetonitrile, 0.1% formic acid), with 20 fractions collected over  
986 time. Each fraction was dried in a SpeedVac (Eppendorf, Germany) and resuspended in 0.1% formic acid before  
987 injection to a mass spectrometer.

988

989 LC-MS/MS was performed on a Thermo Orbitrap Elite (Thermo Fisher, MA) mass spectrometer equipped with a  
990 Waters nanoACQUITY HPLC pump (Waters Corp., MA). Peptides were separated on a 150 μm inner diameter  
991 microcapillary trapping column packed with ~3 cm of C18 Reprosil 5 μm, 100 Å resin (Dr. Maisch GmbH, Germany),  
992 followed by an analytical column packed with ~20 cm of Reprosil 1.8 μm, 200 Å resin. Separation was achieved by  
993 applying a gradient of 5–27% acetonitrile in 0.1% formic acid, over 90 min at 200 nl/min. Electrospray ionization was  
994 achieved by applying a voltage of 2 kV using a home-made electrode junction at the end of the microcapillary column  
995 and sprayed from fused-silica PicoTips (New Objective, MA). The Orbitrap instrument was operated in data-  
996 dependent mode for the mass spectrometry methods. The mass spectrometry survey scan was performed in the  
997 Orbitrap in the range of 410 –1,800 *m/z* at a resolution of 12 × 10<sup>4</sup>, followed by the selection of the twenty most

998 intense ions for HCD-MS2 fragmentation using a precursor isolation width window of 2 m/z, AGC setting of 50,000,  
999 and a maximum ion accumulation of 200 msec. Singly-charged ion species were not subjected to HCD fragmentation.  
1000 Normalized collision energy was set to 37 V and an activation time of 1 msec. Ions in a 10 ppm m/z window around  
1001 ions selected for MS2 were excluded from further selection for fragmentation for 60 sec.  
1002

1003 Mass spectrometry analysis: Raw data were submitted for analysis in Proteome Discoverer 2.1.0.81 (Thermo  
1004 Scientific) software. Assignment of MS/MS spectra was performed using the Sequest HT algorithm by searching the  
1005 data against a protein sequence database that including all entries from *B. subtilis* (UniProt proteome ID  
1006 UP000018540) and other known contaminants such as human keratins and common lab contaminants. Sequest HT  
1007 searches were performed using a 15 ppm precursor ion tolerance and required each peptide's N- and C-termini to  
1008 adhere with trypsin protease specificity, while allowing up to two missed cleavages. TMT tags on peptide N-termini  
1009 and lysine residues (+229.162932 Da) were set as static modifications while methionine oxidation (+15.99492 Da)  
1010 was set as a variable modification. An MS2 spectra assignment false discovery rate (FDR) of 1% on protein level was  
1011 achieved by applying the target-decoy database search. Filtering was performed using Percolator (64-bit version <sup>10</sup>).  
1012 For quantification, a 0.02 m/z window centered on the theoretical m/z value of each of the TMT reporter ions and the  
1013 intensity of the signal closest to the theoretical m/z value was recorded. Reporter ion intensities were exported in a  
1014 results file of the Proteome Discoverer 2.1 search engine in Microsoft Excel format. The total signal intensity across all  
1015 peptides quantified was summed for each TMT channel, and all intensity values were adjusted to account for  
1016 potentially uneven TMT-labelling and/or sample handling variance for each labelled channel. For our final relative  
1017 protein quantitation analysis, all contaminants from the database search were removed from the results, and only the  
1018 remaining *B. subtilis* proteins were used to re-normalize all protein abundances.  
1019

1020

1021  
1022  
1023  
1024  
1025  
1026  
1027  
1028  
1029  
1030  
1031  
1032  
1033  
1034  
1035  
1036  
1037  
1038  
1039  
1040  
1041  
1042  
1043  
1044  
1045  
1046  
1047  
1048  
1049  
1050  
1051  
1052  
1053  
1054  
1055  
1056  
1057  
1058  
1059  
1060  
1061  
1062  
1063  
1064  
1065  
1066  
1067  
1068  
1069  
1070  
1071  
1072

## Strain construction

**bMD277** containing *amyE::Pxyl-mreBCD, minCD (B. megaterium)::erm* was generated upon transformation of Py79 with a five-piece Gibson assembly reaction<sup>11</sup>, that contained the following PCR products. (1) A 1228 bp fragment containing sequence upstream of the *amyE* locus (amplified from Py79 genomic DNA using primers oMD191 and oMD108); (2) the 1673 bp erythromycin-resistance cassette *loxP-erm-loxP* (amplified from pWX467 [gift of D. Rudner] using primers oJM028 and oJM029); (3) a 1532 bp fragment containing the *xyIR* gene, and the *PxylA* promoter with an optimized ribosomal binding sequence (amplified from pDR150 [gift of D. Rudner] using primers oMD73 and oMD226); (4) a 4106 bp fragment containing the *mreB, mreC, mreD, minC* and *minD* alleles of the *B. megaterium* *mreB* operon (amplified from strain QMB 1551 (ATCC 12872) genomic DNA using primers oMD227 and oMD228); and (5) a 1216 bp fragment containing the *amyE* terminator, and sequence downstream of the *amyE* locus (amplified from Py79 genomic DNA using primers oMD196 and oMD197).

**bMD465** harboring *amyE::Pxyl-mreBCD, minCD (B. megaterium)::erm, mreBCD, minC,D::spec (B. megaterium)* was generated upon transformation of bMD277 with a four-piece Gibson assembly reaction, that contained the following PCR products. (1) A 1275 bp fragment containing sequence upstream of the *mreB* gene (amplified from Py79 genomic DNA using primers oMD96 and oMD308); (2) a 4121 bp fragment containing the *mreB, mreC, mreD, minC* and *minD* alleles of the *B. megaterium* *mreB* operon (amplified from strain QMB 1551 (ATCC 12872) genomic DNA using primers oMD313 and oMD314); (3) the 1274 bp spectinomycin-resistance cassette *loxP-spec-loxP* (amplified from pWX466 [gift of D. Rudner] using primers oJM028 and oJM029); and (4) a 1152 bp fragment containing sequence downstream of the *minD* gene (amplified from Py79 genomic DNA using primers oMD300 and oMD315).

**bMK355** harboring *amyE::Pxyl-mreBCD::erm* was built identical to bMD277, except that PCR product (4) was instead a 2493 bp fragment containing the *mreB, mreC, and mreD* alleles of the *B. subtilis* *mreB* operon (amplified from Py79 genomic DNA using primers oMD334 and oMK221).

**bMD543** containing *amyE::Pxyl-mreBCD::erm, ΔmreBCD, ΔminCD::cat* was generated upon transformation of bMK355 with a three-piece Gibson assembly reaction, that contained the following PCR products. (1) A 1305 bp fragment containing sequence upstream of the *mreB* gene (amplified from Py79 genomic DNA using primers oMD96 and oMD298); (2) the 1139 bp chloramphenicol-resistance cassette *loxP-cat-loxP* (amplified from pWX465 [gift of D. Rudner] using primers oJM028 and oJM029); and (3) a 1215 bp fragment containing sequence downstream of the *minD* gene (amplified from Py79 genomic DNA using primers oMD299 and oMD300).

**bMD545** containing *amyE::Pxyl-mreBCD::erm, ΔmreBCD, PmreB-minC,D::spec* was generated upon transformation of bMD543 with a four-piece Gibson assembly reaction, that contained the following PCR products. (1) A 1305 bp fragment containing sequence upstream of the *mreB* gene (amplified from Py79 genomic DNA using primers oMD96 and oMD379); (2) a 1582 bp fragment containing the *minC* and *minD* genes, and the *minD* terminator of the *mreB* operon (amplified from Py79 genomic DNA using primers oMD380 and oMD381); (3) the 1274 bp spectinomycin-resistance cassette *loxP-spec-loxP* (amplified from pWX466 using primers oJM028 and oJM029); and (4) a 1215 bp fragment containing sequence downstream of the *minD* gene (amplified from Py79 genomic DNA using primers oMD300 and oMD382).

**bMD599** harboring *ΔponA::kan* was generated upon transformation of Py79 with a three-piece Gibson assembly reaction, that contained the following PCR products. (1) A 1329 bp fragment containing sequence upstream of the *ponA* gene (amplified from Py79 genomic DNA using primers oMK001 and oMK002); (2) the 1577 bp kanamycin-resistance cassette *loxP-kan-loxP* (amplified from pWX470 [gift of D. Rudner] using primers oJM028 and oJM029); and (3) a 1313 bp fragment containing sequence downstream of the *ponA* gene (amplified from Py79 genomic DNA using primers oMK005 and oMK006).

**bMK005** containing *ΔponA::cat* was built identical to bMD599, except that PCR product (2) was instead the 1139 bp chloramphenicol-resistance cassette *loxP-cat-loxP* (amplified from pWX465 using primers oJM028 and oJM029).

1073 **bMD554** containing *yhdG::Phyperspank-ponA::cat* was generated upon transformation of Py79 with a five-piece  
1074 Gibson assembly reaction, that contained the following PCR products. (1) A 1219 bp fragment containing sequence  
1075 upstream of the *yhdH* gene (amplified from Py79 genomic DNA using primers oMD328 and oMD367), (2) the 1139 bp  
1076 chloramphenicol-resistance cassette *loxP-cat-loxP* (amplified from pWX465 using primers oJM028 and oJM029); (3) a  
1077 1895 bp fragment containing the *lacI* gene, and the *Phyperspank* promoter with an optimized ribosomal binding  
1078 sequence (amplified from pDR111 [gift of D. Rudner] using primers oMD232 and oMD234); (4) a 2799 bp fragment  
1079 containing the *ponA* coding region (amplified from Py79 genomic DNA using primers oMD365 and oMK370); and (5) a  
1080 1252 bp fragment containing the *yhdG* terminator, and sequence downstream of the *yhdG* gene (amplified from Py79  
1081 genomic DNA using primers oMD371 and oMD372).  
1082  
1083 **bMD586** harboring *yhdG::Phyperspank-ponA::cat*,  $\Delta$ *ponA::kan* was generated upon transformation of bMD554 with  
1084 genomic DNA from bMD599.  
1085  
1086 **bMD594** harboring *yhdG::Pspank-ponA::cat* was built identical to bMD554, except that PCR product (1) was instead a  
1087 1287 bp fragment made with primers oMD328 and oMD329; and PCR product (3) containing the *Pspank* promoter  
1088 was instead amplified from pDR110 (gift of D. Rudner).  
1089  
1090 **bMD598** containing *yhdG::Pspank-ponA::cat*,  $\Delta$ *ponA::kan* was generated upon transformation of bMD594 with  
1091 genomic DNA from bMD599.  
1092  
1093 **bMD619** containing *amyE::Pxyl-mreBCD::erm*,  $\Delta$ *mreBCD*, *PmreB-minCD::spec*, *yhdG::Pspank-ponA::cat* was  
1094 generated upon transformation of bMD545 with genomic DNA from bMD594.  
1095  
1096 **bMD620** containing *amyE::Pxyl-mreBCD::erm*,  $\Delta$ *mreBCD*, *PmreB-minCD::spec*, *yhdG::Pspank-ponA::cat*,  $\Delta$ *ponA::kan*  
1097 was generated upon transformation of bMD619 with genomic DNA from bMD599.  
1098  
1099 **bMD622** harboring *amyE::Pxyl-mreBCD::erm*, *yhdG::Pspank-ponA::cat*,  $\Delta$ *ponA::kan* was generated upon  
1100 transformation of bMD598 with genomic DNA from bMK355.  
1101  
1102 **bMD556** harboring *yhdG::Phyperspank-rodA::cat* was built identical to bMD554, except that PCR product (4) was  
1103 instead a 1236 bp fragment containing the *rodA* coding region (amplified from Py79 genomic DNA using primers  
1104 oMD364 and oMK369).  
1105  
1106 **bMD580** containing *yhdG::Phyperspank-rodA::cat*,  $\Delta$ *rodA::kan* was generated upon transformation of bMD556 with a  
1107 three-piece Gibson assembly reaction, that contained the following PCR products. (1) A 1265 bp fragment containing  
1108 sequence upstream of the *rodA* gene (amplified from Py79 genomic DNA using primers oMD388 and oMD389); (2)  
1109 the 1577 bp kanamycin-resistance cassette *loxP-kan-loxP* (amplified from pWX470 using primers oJM028 and  
1110 oJM029); and (3) a 1258 bp fragment containing sequence downstream of the *rodA* gene (amplified from Py79  
1111 genomic DNA using primers oMD386 and oMD387).  
1112  
1113 **bMD592** harboring *Pxyl-rodA::erm* was generated upon transformation of Py79 with a four-piece Gibson assembly  
1114 reaction, that contained the following PCR products. (1) A 1265 bp fragment containing sequence upstream of the  
1115 *rodA* gene (amplified from Py79 genomic DNA using primers oMD388 and oMD389); (2) the 1673 bp erythromycin-  
1116 resistance cassette *loxP-erm-loxP* (amplified from pWX467 using primers oJM028 and oJM029); (3) a 1532 bp  
1117 fragment containing the *xylR* gene, and the *PxylA* promoter with an optimized ribosomal binding sequence (amplified  
1118 from pDR150 using primers oMD73 and oMD226); and (4) a 1271 bp fragment containing the *rodA* coding region  
1119 (amplified from Py79 genomic DNA using primers oMD394 and oMD395).  
1120  
1121 **bMD627** containing *Pxyl-rodA::erm*,  $\Delta$ *bbpH::spec* was generated upon transformation of bMD592 with genomic DNA  
1122 from bDR2487.  
1123

1124 **bMD563** containing *yhdG::Phyperspank-pbpA::cat* was built identical to bMD554, except that PCR product (4) was  
1125 instead a 2204 bp fragment containing the *pbpA* coding region (amplified from Py79 genomic DNA using primers  
1126 oMD316 and oMK368).  
1127  
1128 **bMD573** harboring *yhdG::Phyperspank-pbpA::cat*,  $\Delta$ *pbpH::spec* was generated upon transformation of bMD563 with  
1129 genomic DNA from bRB776.  
1130  
1131 **bMD574** harboring *yhdG::Phyperspank-pbpA::cat*,  $\Delta$ *pbpA::erm*,  $\Delta$ *pbpH::spec* was generated upon transformation of  
1132 bMD573 with genomic DNA from bRB776.  
1133  
1134 **bMD590** containing *Pxyl-pbpA::erm* was generated upon transformation of Py79 with a four-piece Gibson assembly  
1135 reaction, that contained the following PCR products. (1) A 1233 bp fragment containing sequence upstream of the  
1136 *pbpA* gene (amplified from Py79 genomic DNA using primers oMD75 and oMD125); (2) the 1673 bp erythromycin-  
1137 resistance cassette *loxP-erm-loxP* (amplified from pWX467 using primers oJM028 and oJM029); (3) a 1537 bp  
1138 fragment containing the *xyIR* gene, and the *PxylA* promoter containing the *pbpA* ribosomal binding sequence  
1139 (amplified from pDR150 using primers oMD73 and oMD72); and (4) a 1230 bp fragment containing the *pbpA* coding  
1140 region (amplified from Py79 genomic DNA using primers oMD393 and oMD68).  
1141  
1142 **bMD597** harboring *Pxyl-pbpA::erm*,  $\Delta$ *pbpH::spec* was generated upon transformation of bMD590 with genomic DNA  
1143 from bDR2487.  
1144  
1145 **bMD557** containing *amyE::Pxyl-mreBCD::erm*, *yhdG::Phyperspank-rodA::cat* was generated upon transformation of  
1146 bMK355 with genomic DNA from bMD556.  
1147  
1148 **bMD571** harboring *amyE::Pxyl-mreBCD::erm*, *yhdG::Phyperspank-pbpA::cat* was generated upon transformation of  
1149 bMK355 with genomic DNA from bMD563.  
1150  
1151 **bMD631** containing *yhdG::Pspank-pbpA::phleo*,  $\Delta$ *pbpH::spec*,  $\Delta$ *pbpA::cat*, *Pxyl-rodA::erm* was generated upon  
1152 transformation of bRB773 with genomic DNA from bMD592.  
1153  
1154 **bYS201** harboring *HaloTag-11aa-pbpA::cat* was generated upon transformation of Py79 with a four-piece Gibson  
1155 assembly reaction, that contained the following PCR products. (1) A 1233 bp fragment containing sequence upstream  
1156 of the *pbpA* gene (amplified from Py79 genomic DNA using primers oMD75 and oMD125); (2) the 1139 bp  
1157 chloramphenicol-resistance cassette *loxP-cat-loxP* (amplified from pWX465 using primers oJM028 and oJM029); (3) a  
1158 962 bp fragment containing the native *pbpA* promoter, and *B. subtilis*-optimized coding sequence of the HaloTag  
1159 protein (amplified from double-stranded DNA custom-ordered from DNA 2.0/ATUM [Newark, CA] using primers  
1160 oYS598 and oYS599); and (4) a 1229 bp fragment containing the *pbpA* coding region (amplified from Py79 genomic  
1161 DNA using primers oMD68 and oMD69).  
1162  
1163 **bMK385** harboring *amyE::Pxyl-mreBCD::erm*,  $\Delta$ *mreBCD*, *PmreB-minCD::spec*, *HALO-11aa-pbpA::cat* was generated  
1164 upon transformation of bMD545 with genomic DNA from bYS201.  
1165  
1166 **bYS19** containing *mreB-SW-msfGFP* was generated upon transformation of bMD88<sup>12</sup> with a three-piece Gibson  
1167 assembly reaction that contained the following PCR products. (1) A 898 bp PCR fragment containing sequence  
1168 upstream of the *mreB* gene (amplified from Py79 genomic DNA using primers oMD134 and oYS34); (2) a 774 bp  
1169 fragment containing *B. subtilis*-optimized coding sequence of the msfGFP fluorescent protein (amplified from plasmid  
1170 DNA custom-ordered from DNA 2.0/ATUM [Newark, CA] using primers oYS35 and oYS36); and (3) a 1629 bp  
1171 fragment containing sequence downstream of the *mreB* gene (amplified from Py79 genomic DNA using primers  
1172 oYS37 and oMD116). This strain is markerless, and selection was in the presence of 0.5% glucose for colonies that  
1173 no longer required xylose for viability.  
1174



1175 **bYS977** harboring *amyE::P<sub>xyl</sub>-mreB-SW-msfGFP, mreCD::erm*, was built identical to bMD277, except that PCR  
1176 product (4) was instead a 3234 bp fragment containing *mreB-SW-msfGFP, mreC*, and *mreD*, amplified from bYS19  
1177 genomic DNA using primers oMD334 and oMK221).  
1178  
1179 **bYS979** containing *amyE::P<sub>xyl</sub>-mreB-SW-msfGFP, mreCD::erm, ΔmreBCD, ΔminCD::cat* was generated upon  
1180 transformation of bYS977 with genomic DNA from bMD543.  
1181  
1182 **bYS981** harboring *amyE::P<sub>xyl</sub>-mreB-SW-msfGFP, mreCD::erm, ΔmreBCD, PmreB-minC,D::spec* was generated  
1183 upon transformation of bYS979 with genomic DNA from bMD545.  
1184  
1185 **AV88** containing *186::Ptet-dCas9, mreB-SW-msfGFP* was obtained by transduction of strain LC69 with a P1 phage  
1186 lysate obtained from strain NO50, and subsequent excision of the kanamycin resistance cassette by transient  
1187 expression of a flippase. To make the plasmids expressing single-guide RNAs, the psgRNA plasmid was amplified  
1188 three times with primers pairs V162/V165, V163/V166 and V164/V167. The three generated fragments were  
1189 assembled together by Gibson assembly to obtain the pAV20 vector. To insert the anti-GFP single-guide RNAs into  
1190 this vector, we annealed and phosphorylated the following pairs of oligonucleotides: V275/V283 for G5; V274/V282  
1191 for G10; V273/V281 for G14; and V272/V280 for G20. These were then inserted in pAV20 by restriction cloning with  
1192 *Bsal*. As pAV20 carries two sgRNA insertion sites, a non-targeting oligonucleotide pair (V279/V287) was inserted into  
1193 a second site during the same reaction.  
1194  
1195

1196  
1197  
1198  
1199  
1200  
1201  
1202

## Statistics.

All P-values are reported in figures. P-values were calculated in GraphPad Prism using the Mann-Whitney test with a two-tailed P value. Means, SD, and N for all data points are reported in table S1.

## Table S1 – Data summary and statistics.

### A - Figure 1.

| Panel | Strain               | condition.                 | parameter | Value   | SD     | N   |
|-------|----------------------|----------------------------|-----------|---------|--------|-----|
| B     | Py79                 |                            | width(nm) | 754.70  | 81.19  | 466 |
| B     | <i>B. megaterium</i> |                            | width(nm) | 1377.88 | 98.09  | 337 |
| B     | bMD465               | 1% glucose                 | width(nm) | 807.52  | 61.24  | 267 |
| B     | bMD465               | 30 mM xylose               | width(nm) | 771.20  | 104.12 | 135 |
| C     | bMD545               | 0.1 mM xylose              | width(nm) | 1533.00 | 247.40 | 501 |
| C     | bMD545               | 0.5 mM xylose              | width(nm) | 1179.00 | 165.50 | 466 |
| C     | bMD545               | 1 mM xylose                | width(nm) | 1059.00 | 145.70 | 395 |
| C     | bMD545               | 1.75 mM xylose             | width(nm) | 930.80  | 83.53  | 282 |
| C     | bMD545               | 2.5 mM xylose              | width(nm) | 807.80  | 90.69  | 461 |
| C     | bMD545               | 5 mM xylose                | width(nm) | 735.00  | 80.10  | 269 |
| C     | bMD545               | 30 mM xylose               | width(nm) | 722.10  | 60.64  | 619 |
| C     | bMK355               | 30 mM xylose               | width(nm) | 696.50  | 85.40  | 276 |
| D     | bMD599               |                            | width(nm) | 575.90  | 97.00  | 174 |
| D     | bMD598               | 0 M IPTG                   | width(nm) | 580.60  | 60.57  | 148 |
| D     | bMD598               | 1 μM IPTG                  | width(nm) | 601.00  | 68.93  | 141 |
| D     | bMD598               | 10 μM IPTG                 | width(nm) | 651.40  | 74.63  | 742 |
| D     | bMD598               | 25 μM IPTG                 | width(nm) | 767.80  | 91.60  | 309 |
| D     | bMD598               | 100 μM IPTG                | width(nm) | 825.00  | 78.83  | 361 |
| D     | bMD598               | 1000 μM IPTG               | width(nm) | 868.70  | 78.53  | 654 |
| D     | bMD586               | 25 μM IPTG                 | width(nm) | 935.30  | 106.00 | 332 |
| D     | bMD586               | 50 μM IPTG                 | width(nm) | 1031.30 | 97.14  | 381 |
| D     | bMD586               | 100 μM IPTG                | width(nm) | 1149.45 | 119.40 | 133 |
| D     | bMD586               | 1000 μM IPTG               | width(nm) | 1283    | 137.8  | 619 |
| D     | bMD554               | 1000 μM IPTG               | width(nm) | 1519    | 169.4  | 276 |
| E     | bMD620               | 0.1 mM xylose, 0 M IPTG    | width(nm) | 786.00  | 159.30 | 452 |
| E     | bMD620               | 0.5 mM xylose, 1 μM IPTG   | width(nm) | 744.50  | 137.90 | 265 |
| E     | bMD620               | 2.5 mM xylose, 10 μM IPTG  | width(nm) | 754.40  | 76.76  | 522 |
| E     | bMD620               | 5 mM xylose, 25 μM IPTG    | width(nm) | 749.00  | 73.91  | 288 |
| E     | bMD620               | 30 mM xylose, 100 μM IPTG  | width(nm) | 784.80  | 76.63  | 589 |
| E     | bMD622               | 30 mM xylose, 1000 μM IPTG | width(nm) | 773.30  | 58.09  | 665 |
| F     | Py79                 | LB                         | width(nm) | 770.50  | 44.09  | 590 |
| F     | Py79                 | CH                         | width(nm) | 754.70  | 81.19  | 466 |
| F     | Py79                 | S750 glucose               | width(nm) | 767.49  | 78.52  | 389 |
| F     | Py79                 | S750 Glycerol              | width(nm) | 756.90  | 70.21  | 596 |
| F     | Py79                 | S750 Sucrose               | width(nm) | 761.51  | 63.79  | 360 |

1203  
1204

1205  
1206

### B - Figure 2

| Panel | Strain | Conditions            | parameter      | Value | SD     | 1207 |
|-------|--------|-----------------------|----------------|-------|--------|------|
| A     | bMD592 | 0.1mM xyl             | width(nm)      | 1113  | 221.8  | 387  |
| A     | bMD592 | 0.5mM xyl             | width(nm)      | 959.8 | 156.6  | 208  |
| A     | bMD592 | 1mM xyl               | width(nm)      | 753.2 | 106.6  | 370  |
| A     | bMD592 | 30mM xyl              | width(nm)      | 964.2 | 77.79  | 466  |
| A     | bMD580 | 1mM IPTG              | width(nm)      | 1133  | 110.8  | 555  |
| A     | bMD556 | 1mM IPTG              | width(nm)      | 1323  | 155.5  | 788  |
| A     | bMD598 | 0.1mM xyl             | width(nm)      | 1081  | 206.5  | 455  |
| A     | bMD599 | 0.5mM xyl             | width(nm)      | 927.6 | 117.8  | 442  |
| A     | bMD600 | 1mM xyl               | width(nm)      | 749.3 | 77.61  | 135  |
| A     | bMD601 | 30mM xyl              | width(nm)      | 782   | 52.83  | 91   |
| A     | bMD602 | 1mM IPTG              | width(nm)      | 790.1 | 66.96  | 288  |
| A     | bMD603 | 1mM IPTG              | width(nm)      | 795.1 | 59.96  | 443  |
| B     | bMD627 | 0.025mM xyl           | width(nm)      | 1381  | 334.7  | 92   |
| B     | bMD627 | 1mM xyl               | width(nm)      | 756.4 | 52.33  | 983  |
| B     | bMD627 | 30mM xyl              | width(nm)      | 793.4 | 62.71  | 414  |
| B     | bMD631 | 0.25μM xyl, 15μM IPTG | width(nm)      | 1346  | 371.4  | 79   |
| B     | bMD631 | 1mM xyl, 15μM IPTG    | width(nm)      | 757.9 | 55.22  | 441  |
| B     | bMD631 | 30mM xyl 15μM IPTG    | width(nm)      | 966.1 | 80.25  | 503  |
| B     | bMD631 | 30mM xyl 20μM IPTG    | width(nm)      | 902   | 106.4  | 262  |
| C     | bMD557 | 30mM xyl, 40μM IPTG   | width(nm)      | 987.1 | 87.58  | 230  |
| C     | bMD557 | 30mM xyl 100μM IPTG   | width(nm)      | 856.5 | 121.3  | 266  |
| D     | bMD620 | 0.1m M xyl 0 IPTG     | Surface growth | 0.755 | 0.1681 | 183  |
| D     | bMD620 | 0.5mM xyl 1μM IPTG    | Surface growth | 1.025 | 0.171  | 63   |
| D     | bMD620 | 2.5mM xyl 10μM IPTG   | Surface growth | 1.146 | 0.1108 | 57   |
| D     | bMD620 | 5mM xyl 25μM IPTG     | Surface growth | 1.174 | 0.0692 | 78   |
| D     | bMD620 | 30mM xyl 100μM IPTG   | Surface growth | 1.282 | 0.1895 | 46   |
| D     | bMD622 | 30mM xyl 1mM IPTG     | Surface growth | 1.194 | 0.1063 | 54   |
| D     | bMD620 | 0.1mM xyl 25μM IPTG   | Surface growth | 0.816 | 0.2653 | 17   |
| D     | bMD620 | 0.5mM xyl 25μM IPTG   | Surface growth | 1.203 | 0.138  | 111  |
| D     | bMD620 | 1mM xyl 25μM IPTG     | Surface growth | 1.182 | 0.174  | 59   |
| D     | bMD620 | 2.5mM xyl 25μM IPTG   | Surface growth | 1.188 | 0.1229 | 121  |
| D     | bMD620 | 5mM xyl 25μM IPTG     | Surface growth | 1.174 | 0.0691 | 78   |
| D     | bMD620 | 30mM xyl 25μM IPTG    | Surface growth | 1.326 | 0.1969 | 50   |
| D     | bMD620 | 5mM xyl 1μM IPTG      | Surface growth | 1.274 | 0.182  | 78   |
| D     | bMD620 | 5mM xyl 10μM IPTG     | Surface growth | 1.256 | 0.1302 | 140  |
| D     | bMD620 | 5mM xyl 25μM IPTG     | Surface growth | 1.174 | 0.0692 | 78   |
| D     | bMD620 | 5mM xyl 50μM IPTG     | Surface growth | 1.288 | 0.1677 | 486  |
| D     | bMD620 | 5mM xyl 100μM IPTG    | Surface growth | 1.353 | 0.1076 | 123  |
| D     | bMD599 |                       | Surface growth | 1.263 | 0.1487 | 84   |
| D     | bAM268 |                       | Surface growth | 1.147 | 0.1432 | 177  |
| D     | bAM288 | 25μM IPTG             | Surface growth | 1.107 | 0.1121 | 51   |
| D     | bMD631 | 1mM xyl 15μM IPTG     | Surface growth | 1.398 | 0.1488 | 187  |
| D     | bMD631 | 30mM xyl 15μM IPTG    | Surface growth | 1.327 | 0.0789 | 49   |
| D     | bMD631 | 30mM xyl 40μM IPTG    | Surface growth | 1.173 | 0.1377 | 47   |
| D     | Py79   |                       | Surface growth | 1.223 | 0.1527 | 84   |
| D     | bMD620 | 0.1mM xyl 0 IPTG      | Bulk growth    | 1.49  | 0.1    | 5    |
| D     | bMD620 | 0.5mM xyl 1μM IPTG    | Bulk growth    | 1.76  | 0.09   | 10   |
| D     | bMD620 | 2.5mM xyl 10μM IPTG   | Bulk growth    | 1.85  | 0.17   | 9    |
| D     | bMD620 | 5mM xyl 25μM IPTG     | Bulk growth    | 1.85  | 0.07   | 5    |
| D     | bMD620 | 30mM xyl 100μM IPTG   | Bulk growth    | 1.89  | 0.05   | 5    |
| D     | bMD622 | 30mM xyl 1mM IPTG     | Bulk growth    | 2     | 0.03   | 5    |
| D     | bMD620 | 0.1mM xyl 25μM IPTG   | Bulk growth    | 1.277 | 0.07   | 5    |
| D     | bMD620 | 0.5mM xyl 25μM IPTG   | Bulk growth    | 1.98  | 0.05   | 5    |
| D     | bMD620 | 1mM xyl 25μM IPTG     | Bulk growth    | 1.88  | 0.04   | 5    |
| D     | bMD620 | 2.5mM xyl 25μM IPTG   | Bulk growth    | 1.85  | 0.03   | 5    |
| D     | bMD620 | 5mM xyl 25μM IPTG     | Bulk growth    | 2.05  | 0.13   | 10   |
| D     | bMD620 | 30mM xyl 25μM IPTG    | Bulk growth    | 1.97  | 0.03   | 5    |
| D     | bMD620 | 5mM xyl 1μM IPTG      | Bulk growth    | 1.84  | 0.18   | 10   |
| D     | bMD620 | 5mM xyl 10μM IPTG     | Bulk growth    | 1.96  | 0.14   | 9    |
| D     | bMD620 | 5mM xyl 25μM IPTG     | Bulk growth    | 1.76  | 0.05   | 5    |
| D     | bMD620 | 5mM xyl 50μM IPTG     | Bulk growth    | 1.83  | 0.03   | 5    |
| D     | bMD620 | 5mM xyl 100μM IPTG    | Bulk growth    | 1.86  | 0.05   | 5    |
| D     | bMD599 |                       | Bulk growth    | 1.19  | 0.04   | 10   |
| D     | bAM268 |                       | Bulk growth    | 1.17  | 0.03   | 5    |
| D     | bAM288 | 25μM IPTG             | Bulk growth    | 1.7   | 0.02   | 5    |
| D     | Py79   | 25μM IPTG             | Bulk growth    | 2     | 0.13   | 26   |

### C - Figure 3

| Panel | Strain | Conditions | Width (um) | Width SD | (N) | Filament density | Density SD |
|-------|--------|------------|------------|----------|-----|------------------|------------|
| B     | YS981  | 0.1mM Xyl  | 1.3826     | 0.2      | 336 | 0.29             | 0.28       |
| B     | YS981  | 0.25mM Xyl | 1.2808     | 0.2894   | 214 | 0.37             | 0.35       |
| B     | YS981  | 0.5mM Xyl  | 1.2557     | 0.1674   | 130 | 0.55             | 0.42       |
| B     | YS981  | 1mM Xyl    | 1.0093     | 0.1128   | 113 | 1.49             | 0.85       |
| B     | YS981  | 1.75mM Xyl | 1.0661     | 0.0969   | 116 | 1.36             | 0.58       |
| B     | YS981  | 2.5mM Xyl  | 1.0469     | 0.1315   | 107 | 1.64             | 0.48       |
| B     | YS981  | 5mM Xyl    | 1.0051     | 0.0985   | 92  | 2.14             | 0.85       |
| B     | YS981  | 30mM Xyl   | 1.0124     | 0.0731   | 190 | 2.12             | 0.83       |

1209

## D - Figure S3 – Simulation

| Panel | Parameter | Input value | Assay             | Filament density | SP210  | N |
|-------|-----------|-------------|-------------------|------------------|--------|---|
| A     | density   | 0.7958      | Correlated motion | 0.8435           | 0.1207 | 5 |
| A     | density   | 1.5915      | Correlated motion | 1.7985           | 0.1207 | 5 |
| A     | density   | 2.3873      | Correlated motion | 2.3873           | 0.4674 | 5 |
| A     | density   | 3.1831      | Correlated motion | 3.3263           | 0.62   | 5 |
| A     | density   | 3.9789      | Correlated motion | 3.7561           | 0.5261 | 5 |
| A     | density   | 4.7746      | Correlated motion | 4.2494           | 0.795  | 5 |
| A     | density   | 5.5704      | Correlated motion | 4.902            | 0.5997 | 5 |
| A     | density   | 6.3662      | Correlated motion | 4.8383           | 0.6149 | 5 |
| A     | density   | 7.162       | Correlated motion | 5.077            | 0.462  | 5 |
| A     | density   | 0.7958      | Tracking          | 0.7321           | 0.2478 | 5 |
| A     | density   | 1.5915      | Tracking          | 1.4006           | 0.1332 | 5 |
| A     | density   | 2.3873      | Tracking          | 1.8462           | 0.1424 | 5 |
| A     | density   | 3.1831      | Tracking          | 2.1008           | 0.2293 | 5 |
| A     | density   | 3.9789      | Tracking          | 2.7375           | 0.5559 | 5 |
| A     | density   | 4.7746      | Tracking          | 2.9444           | 0.497  | 5 |
| A     | density   | 5.5704      | Tracking          | 3.0876           | 0.2999 | 5 |
| A     | density   | 6.3662      | Tracking          | 3.008            | 0.3487 | 5 |
| A     | density   | 7.162       | Tracking          | 3.1831           | 0.4135 | 5 |
| B     | velocity  | 20          | Correlated motion | 2.6101           | 0.4034 | 5 |
| B     | velocity  | 25          | Correlated motion | 3.3263           | 0.43   | 5 |
| B     | velocity  | 30          | Correlated motion | 3.2945           | 0.5114 | 5 |
| B     | velocity  | 35          | Correlated motion | 3.3423           | 0.2699 | 5 |
| B     | velocity  | 40          | Correlated motion | 3.0399           | 0.1815 | 5 |
| B     | velocity  | 45          | Correlated motion | 2.9125           | 0.2361 | 5 |
| B     | velocity  | 50          | Correlated motion | 3.1513           | 0.3585 | 5 |
| B     | velocity  | 60          | Correlated motion | 2.9762           | 0.2361 | 5 |
| B     | velocity  | 70          | Correlated motion | 2.7375           | 0.215  | 5 |
| B     | velocity  | 80          | Correlated motion | 2.5624           | 0.2414 | 5 |
| B     | velocity  | 90          | Correlated motion | 2.9125           | 0.3716 | 5 |
| B     | velocity  | 20          | Tracking          | 2.4032           | 0.2945 | 5 |
| B     | velocity  | 25          | Tracking          | 2.6261           | 0.1866 | 5 |
| B     | velocity  | 30          | Tracking          | 2.451            | 0.2414 | 5 |
| B     | velocity  | 35          | Tracking          | 2.4351           | 0.2293 | 5 |
| B     | velocity  | 40          | Tracking          | 2.5465           | 0.4708 | 5 |
| B     | velocity  | 45          | Tracking          | 2.3237           | 0.3051 | 5 |
| B     | velocity  | 50          | Tracking          | 2.6738           | 0.438  | 5 |
| B     | velocity  | 60          | Tracking          | 2.642            | 0.495  | 5 |
| B     | velocity  | 70          | Tracking          | 3.008            | 0.3051 | 5 |
| B     | velocity  | 80          | Tracking          | 2.7056           | 0.4606 | 5 |
| B     | velocity  | 90          | Tracking          | 2.2759           | 0.165  | 5 |

| Panel | Parameter | Input value | Assay             | Filament density | SD     | N |
|-------|-----------|-------------|-------------------|------------------|--------|---|
| C     | number    | -30         | Correlated motion | 3.947            | 0.3009 | 5 |
| C     | number    | -25         | Correlated motion | 3.5173           | 0.3749 | 5 |
| C     | number    | -20         | Correlated motion | 3.5173           | 0.4112 | 5 |
| C     | number    | -15         | Correlated motion | 3.3741           | 0.4271 | 5 |
| C     | number    | -10         | Correlated motion | 3.3104           | 0.6381 | 5 |
| C     | number    | -5          | Correlated motion | 3.2627           | 0.5033 | 5 |
| C     | number    | 0           | Correlated motion | 3.1831           | 0.5955 | 5 |
| C     | number    | 5           | Correlated motion | 3.4855           | 0.5912 | 5 |
| C     | number    | 10          | Correlated motion | 3.5969           | 0.1631 | 5 |
| C     | number    | 15          | Correlated motion | 3.7083           | 0.412  | 5 |
| C     | number    | 20          | Correlated motion | 3.7879           | 0.4761 | 5 |
| C     | number    | 25          | Correlated motion | 3.581            | 0.464  | 5 |
| C     | number    | 30          | Tracking          | 3.6765           | 0.5261 | 5 |
| C     | angle     | -30         | Tracking          | 3.3741           | 0.3262 | 5 |
| C     | angle     | -25         | Tracking          | 2.8648           | 0.232  | 5 |
| C     | angle     | -20         | Tracking          | 3.008            | 0.3252 | 5 |
| C     | angle     | -15         | Tracking          | 2.6897           | 0.43   | 5 |
| C     | angle     | -10         | Tracking          | 2.6579           | 0.3061 | 5 |
| C     | angle     | -5          | Tracking          | 2.451            | 0.2722 | 5 |
| C     | angle     | 0           | Tracking          | 2.2918           | 0.3348 | 5 |
| C     | angle     | 5           | Tracking          | 2.7215           | 0.3252 | 5 |
| C     | angle     | 10          | Tracking          | 2.8966           | 0.3923 | 5 |
| C     | angle     | 15          | Tracking          | 2.8011           | 0.1038 | 5 |
| C     | angle     | 20          | Tracking          | 2.6897           | 0.3441 | 5 |
| C     | angle     | 25          | Tracking          | 2.7693           | 0.2836 | 5 |
| C     | angle     | 30          | Tracking          | 3.4218           | 0.1125 | 5 |
| D     | length    | 5           | Correlated motion | 3.0876           | 0.3348 | 5 |
| D     | length    | 25          | Correlated motion | 3.1831           | 0.1489 | 5 |
| D     | length    | 50          | Correlated motion | 3.2786           | 0.3664 | 5 |
| D     | length    | 125         | Correlated motion | 3.1513           | 0.0907 | 5 |
| D     | length    | 250         | Correlated motion | 3.0717           | 0.5114 | 5 |
| D     | length    | 300         | Correlated motion | 3.1354           | 0.4893 | 5 |
| D     | length    | 350         | Correlated motion | 2.5306           | 0.76   | 5 |
| D     | length    | 375         | Correlated motion | 2.5146           | 0.2293 | 5 |
| D     | length    | 400         | Correlated motion | 2.3396           | 0.1332 | 5 |
| D     | length    | 450         | Correlated motion | 2.0531           | 0.206  | 5 |
| D     | length    | 500         | Correlated motion | 1.8303           | 0.4285 | 5 |
| D     | length    | 5           | Tracking          | 2.2759           | 0.1743 | 5 |
| D     | length    | 25          | Tracking          | 2.3555           | 0.5415 | 5 |
| D     | length    | 50          | Tracking          | 2.4351           | 0.1832 | 5 |
| D     | length    | 125         | Tracking          | 2.5465           | 0.1125 | 5 |
| D     | length    | 250         | Tracking          | 2.5783           | 0.2615 | 5 |
| D     | length    | 300         | Tracking          | 2.6579           | 0.438  | 5 |
| D     | length    | 350         | Tracking          | 2.5783           | 0.4344 | 5 |
| D     | length    | 375         | Tracking          | 2.4669           | 0.3858 | 5 |
| D     | length    | 400         | Tracking          | 2.9125           | 0.3163 | 5 |
| D     | length    | 450         | Tracking          | 3.0399           | 0.2945 | 5 |
| D     | length    | 500         | Tracking          | 2.8011           | 0.4886 | 5 |

1211

**E - Figure 4, S4**

| Panel       | Strain | Conditions        | Parameter             | Value  | SD      | (N)  |
|-------------|--------|-------------------|-----------------------|--------|---------|------|
| B, C        | YS981  | 30/0.001          | Width                 | 1.3826 | 0.2     | 93   |
| B, C        | YS981  | 5/0.025           | Width                 | 1.2808 | 0.2894  | 214  |
| B, C        | YS981  | 0.5/100           | Width                 | 1.2557 | 0.1674  | 130  |
| B, E        | YS981  | 30/0.001          | Retardance            |        |         | 93   |
| B, E        | YS981  | 5/0.025           | Retardance            |        |         | 91   |
| B, E        | YS981  | 0.5/100           | Retardance            |        |         | 137  |
| S4A         | bMD620 | 30/0.001          | Cell width (TEM)      | 512.38 | 45.5616 | 16   |
| S4A         | bMD620 | 5/0.025           | Cell width (TEM)      | 705.71 | 51.6678 | 35   |
| S4A         | bMD620 | 0.5/100           | Cell width (TEM)      | 1138.8 | 229.043 | 58   |
| S4A         | Py79   |                   | Cell width (TEM)      | 748.08 | 31.5936 | 32   |
| S4A         | bMD620 | 30/0.001          | Cell wall width (TEM) | 14     | 3.2609  | 16   |
| S4A         | bMD620 | 5/0.025           | Cell wall width (TEM) | 15.34  | 1.6439  | 35   |
| S4A         | bMD620 | 0.5/100           | Cell wall width (TEM) | 19.51  | 3.7475  | 58   |
| S4A         | Py79   |                   | Cell wall width (TEM) | 15.11  | 1.3955  | 32   |
| H, S4B, S4C | bMD620 | 5/0.025 preshock  | Sacculus length       | 4470   | 1138    | 446  |
| H, S4B, S4C | bMD620 | 5/0.025 preshock  | Sacculus Width        | 782.6  | 53.03   | 446  |
| H, S4B, S4C | bMD620 | 5/0.025 shocked   | Sacculus length       | 3120   | 973.5   | 309  |
| H, S4B, S4C | bMD620 | 5/0.025 shocked   | Sacculus Width        | 676.6  | 41.38   | 309  |
| H, S4B, S4C | bMD620 | 0.5/100 preshock  | Sacculus length       | 4261   | 1063    | 145  |
| H, S4B, S4C | bMD620 | 0.5/100 preshock  | Sacculus Width        | 1283   | 199.2   | 145  |
| H, S4B, S4C | bMD620 | 0.5/100 shocked   | Sacculus length       | 3386   | 812.6   | 146  |
| H, S4B, S4C | bMD620 | 0.5/100 shocked   | Sacculus Width        | 1085   | 164.9   | 146  |
| H, S4B, S4C | bMD620 | 30/0.001 preshock | Sacculus length       | 3789   | 1535    | 1112 |
| H, S4B, S4C | bMD620 | 30/0.001 preshock | Sacculus Width        | 586.4  | 43.09   | 1112 |
| H, S4B, S4C | bMD620 | 30/0.001 shocked  | Sacculus length       | 2315   | 919.6   | 408  |
| H, S4B, S4C | bMD620 | 30/0.001 shocked  | Sacculus Width        | 527.6  | 59.77   | 408  |

1212

1213

1214

**F - Figure 5.**

| Panel | Strain          | Mutation           | Conditions    | Width (um) | Width SD | (N)  | Filament density | Density SD | Source.       |
|-------|-----------------|--------------------|---------------|------------|----------|------|------------------|------------|---------------|
| A     | NO50 - A20S     | A20S               |               | 0.8671     | 0.0969   | 474  | 1.15             | 0.39       | <sup>13</sup> |
| A     | NO50 - L322Q    | L322Q              |               | 0.8387     | 0.084    | 661  | 1.19             | 0.65       | <sup>13</sup> |
| A     | NO50 - S14A     | S14A               |               | 0.975      | 0.1879   | 559  | 1.01             | 0.31       | <sup>13</sup> |
| A     | NO50 - R74C     | R74C               |               | 0.91       | 0.1645   | 517  | 1.01             | 0.43       | <sup>13</sup> |
| A     | NO50            | WT                 |               | 1.1343     | 0.1243   | 656  | 1.04             | 0.24       | <sup>13</sup> |
| A     | NO50 - A53Δ     | A53Δ               |               | 1.2579     | 0.1261   | 610  | 0.40             | 0.23       | <sup>13</sup> |
| A     | NO50 - S185F    | S185F              |               | 0.9296     | 0.154    | 715  | 0.88             | 0.37       | <sup>13</sup> |
| A     | NO50 - F84V     | F84V               |               | 1.2876     | 0.2494   | 946  | 0.39             | 0.22       | <sup>13</sup> |
| A     | RM478           | S14A ΔRodZ         |               | 1.3285     | 0.2075   | 388  | 0.33             | 0.18       | <sup>14</sup> |
| A     | eKC508          | WT                 |               | 1.18       | 0.11     | 323  | 0.41             | 0.41       | <sup>15</sup> |
| A     | eKC507          | E276D              |               | 0.97       | 0.08     | 220  | 1.03             | 0.47       | <sup>16</sup> |
| A     | eKC967          | D83E               |               | 1.12       | 0.255    | 384  | 0.72             | 0.17       | <sup>15</sup> |
| A     | eKC968          | R124C              |               | 1.0061     | 0.2395   | 197  | 0.91             | 0.26       | <sup>15</sup> |
| A     | eKC969          | A174T              |               | 1.2832     | 0.1777   | 279  | 0.54             | 0.27       | <sup>15</sup> |
| A     | eKC407          | EC - mrdA          |               | 1.1325     | 0.1199   | 249  | 0.83             | 0.31       | <sup>16</sup> |
| A     | eKC408          | ST - mrdA          |               | 1.0715     | 0.1358   | 131  | 0.95             | 0.41       | <sup>16</sup> |
| A     | eKC409          | VC - mrdA          |               | 1.4799     | 0.1121   | 773  | 0.42             | 0.16       | <sup>16</sup> |
| A     | eKC410          | YP - mrdA          |               | 1.1447     | 0.1887   | 457  | 0.85             | 0.31       | <sup>16</sup> |
| A     | eKC717          |                    | 0.005% Arab.  | 1.4657     | 0.2501   | 775  | 0.33             | 0.13       | <sup>15</sup> |
| A     | eKC717          |                    | 0.01% Arab.   | 1.2809     | 0.1892   | 561  | 0.44             | 0.25       | <sup>15</sup> |
| A     | eKC717          |                    | 0.05% Arab.   | 1.229      | 0.149    | 794  | 0.88             | 0.34       | <sup>15</sup> |
| A     | eKC717          |                    | 0.1% Arab.    | 1.2239     | 0.2842   | 575  | 0.88             | 0.46       | <sup>15</sup> |
| A     | eKC717          |                    | 0.2% Arab.    | 1.194      | 0.2329   | 239  | 0.90             | 0.34       | <sup>15</sup> |
| B     | AV88 pAV20 G5   | WT – no repression | 100 ng/ml ATc | 1.1132     | 0.1044   | 812  | 0.93             | 0.31       | This work.    |
| B     | AV88 pAV20 G10  |                    | 100 ng/ml ATc | 1.1284     | 0.1981   | 691  | 0.80             | 0.37       | This work.    |
| B     | AV88 pAV20 G14  |                    | 100 ng/ml ATc | 1.6528     | 0.308    | 531  | 0.23             | 0.21       | This work.    |
| B     | AV88 pAV20 G20  |                    | 100 ng/ml ATc | 1.9188     | 0.278    | 451  | 0.15             | 0.09       | This work.    |
| B     | AV88 pcrRNA G10 |                    | 100 ng/ml ATc | 1.1355     | 0.1052   | 1103 | 0.89             | 0.44       | This work.    |
| B     | AV88 pcrRNA G11 |                    | 100 ng/ml ATc | 1.2541     | 0.1008   | 878  | 0.56             | 0.33       | This work.    |
| B     | AV88 pcrRNA G14 |                    | 100 ng/ml ATc | 1.2938     | 0.1323   | 342  | 0.56             | 0.34       | This work.    |
| B     | AV88 pcrRNA G20 |                    | 100 ng/ml ATc | 1.9238     | 0.3106   | 409  | 0.08             | 0.07       | This work.    |

1215

1216 **Table S2 – *B. subtilis* strains used in this study**

| Strain  | Relevant genotype                                                                          | Source    |
|---------|--------------------------------------------------------------------------------------------|-----------|
| bMD277  | <i>amyE::Pxyl-mreBCD, minCD (B. megaterium)::erm</i>                                       | This work |
| bMD465  | <i>amyE::Pxyl-mreBCD, minCD (B. megaterium)::erm, mreBCD, minC,D::spec (B. megaterium)</i> | This work |
| bMK355  | <i>amyE::Pxyl-mreBCD::erm</i>                                                              | This work |
| bMD543  | <i>amyE::Pxyl-mreBCD::erm ΔmreBCD, ΔminCD::cat</i>                                         | This work |
| bMD545  | <i>amyE::Pxyl-mreBCD::erm ΔmreBCD, PmreB-minCD::spec</i>                                   | This work |
| bMD599  | <i>ΔponA::kan</i>                                                                          | This work |
| bMK005  | <i>ΔponA::cat</i>                                                                          | 17        |
| bMD554  | <i>yhdG::Phyperspank-ponA::cat</i>                                                         | This work |
| bMD586  | <i>yhdG::Phyperspank-ponA::cat ΔponA::kan</i>                                              | This work |
| bMD594  | <i>yhdG::Pspank-ponA::cat</i>                                                              | This work |
| bMD598  | <i>yhdG::Pspank-ponA::cat ΔponA::kan</i>                                                   | This work |
| bMD619  | <i>amyE::Pxyl-mreBCD::erm ΔmreBCD, PmreB-minCD::spec yhdG::Pspank-ponA::cat</i>            | This work |
| bMD620  | <i>amyE::Pxyl-mreBCD::erm ΔmreBCD, PmreB-minCD::spec yhdG::Pspank-ponA::cat ΔponA::kan</i> | This work |
| bMD622  | <i>amyE::Pxyl-mreBCD::erm yhdG::Pspank-ponA::cat ΔponA::kan</i>                            | This work |
| bMD556  | <i>yhdG::Phyperspank-rodA::cat</i>                                                         | This work |
| bMD580  | <i>yhdG::Phyperspank-rodA::cat ΔrodA::kan</i>                                              | This work |
| bMD592  | <i>Pxyl-rodA::erm</i>                                                                      | This work |
| bDR2487 | <i>ΔpbpH::spec</i>                                                                         | 18        |
| bMD627  | <i>Pxyl-rodA::erm ΔpbpH::spec</i>                                                          | This work |
| bMD563  | <i>yhdG::Phyperspank-pbpA::cat</i>                                                         | This work |
| bRB776  | <i>yhdG::Pspank-pbpH::phleo ΔpbpH::spec ΔpbpA::erm</i>                                     | 18        |
| bMD573  | <i>yhdG::Phyperspank-pbpA::cat ΔpbpH::spec</i>                                             | This work |
| bMD574  | <i>yhdG::Phyperspank-pbpA::cat ΔpbpA::erm ΔpbpH::spec</i>                                  | This work |
| bMD590  | <i>Pxyl-pbpA::erm</i>                                                                      | This work |
| bMD597  | <i>Pxyl-pbpA::erm ΔpbpH::spec</i>                                                          | This work |
| bMD557  | <i>amyE::Pxyl-mreBCD::erm yhdG::Phyperspank-rodA::cat</i>                                  | This work |
| bMD571  | <i>amyE::Pxyl-mreBCD::erm yhdG::Phyperspank-pbpA::cat</i>                                  | This work |
| bRB773  | <i>yhdG::Pspank-pbpA::phleo ΔpbpH::spec ΔpbpA::cat</i>                                     | 18        |
| bMD631  | <i>yhdG::Pspank-pbpA::phleo ΔpbpH::spec ΔpbpA::cat Pxyl-rodA::erm</i>                      | This work |
| bYS201  | <i>HaloTag-11aa-pbpA::cat</i>                                                              | This work |
| bMK385  | <i>amyE::Pxyl-mreBCD::erm ΔmreBCD, PmreB-minCD::spec HaloTag-11aa-pbpA::cat</i>            | This work |
| bAM268  | <i>ΔpbpF ΔpbpG ΔpbpD ΔponA::kan</i>                                                        | 19        |
| bAM288  | <i>ΔpbpF ΔpbpG ΔpbpD ΔponA::kan amyE::Phyperspank-rodA-His10::spec</i>                     | 19        |
| bMD88   | <i>Pxyl-mreC::erm</i>                                                                      | 12        |
| bYS09   | <i>mreB-mNeonGreen</i>                                                                     | 20        |
| bYS19   | <i>mreB-SW-msfGFP</i>                                                                      | This work |
| bYS977  | <i>amyE::Pxyl-mreB-SW-msfGFP,mreC,mreD::erm</i>                                            | This work |
| bYS979  | <i>amyE::Pxyl-mreB-SW-msfGFP,mreC,mreD::erm, ΔmreBCD, ΔminCD::cat</i>                      | This work |
| bYS981  | <i>amyE::Pxyl-mreB-SW-msfGFP,mreC,mreD::erm, ΔmreBCD, PmreB-minC,D::spec</i>               | This work |

1217

1218

**Table S3 – *E. coli* strains used in this study**

| Strain       | Relevant genotype                                            | Source     |
|--------------|--------------------------------------------------------------|------------|
| MG1655       | Wild-type <i>E. coli</i>                                     | CGSC #6300 |
| NO50         | <i>mreB-msfGFP sw</i>                                        | 13         |
| NO50 - A20S  | <i>NO50 with mreB(A20S)</i>                                  | 13         |
| NO50 - L322Q | <i>NO50 with mreB(L322Q)</i>                                 | 13         |
| NO50 - ΔA53  | <i>NO50 with mreB(ΔA53)</i>                                  | 13         |
| NO50 - S185F | <i>NO50 with mreB(S185F)</i>                                 | 13         |
| NO50 - F84V  | <i>NO50 with mreB(F84V)</i>                                  | 13         |
| NO50 - R74C  | <i>NO50 with mreB(R74C)</i>                                  | 13         |
| NO50 - S14A  | <i>NO50 with mreB(S14A)</i>                                  | 14         |
| RM478        | <i>ΔrodZ, mreB(S14A)-msfGFP</i>                              | 14         |
| KC407        | <i>ΔmrdA csrA::frt, mreB::msfGFP-mreB" + pww308 Ec mrdA</i>  | 16         |
| KC408        | <i>ΔmrdA csrA::frt, mreB::msfGFP-mreB" + pww308 St mrdA</i>  | 16         |
| KC409        | <i>ΔmrdA csrA::frt, mreB::msfGFP-mreB" + pww308 Vc mrdA</i>  | 16         |
| KC410        | <i>ΔmrdA csrA::frt, mreB::msfGFP-mreB" + pww308 Yp mrdA</i>  | 16         |
| NO34         | <i>csrD::kan, mreB::msfGFP-mreB</i>                          | 13         |
| KC507        | <i>csrD::kan, mreB::msfGFP-mreB-E276D</i>                    | 15         |
| KC717        | <i>csrD::kan, mreB::msfGFP-mreB,ProdZ&lt;(frt araC PBAD)</i> | 15         |

|                 |                                                      |           |
|-----------------|------------------------------------------------------|-----------|
| KC967           | <i>csrD::kan, mreB::msfGFP-mreB'-D83E</i>            | 15        |
| KC968           | <i>csrD::kan, mreB::msfGFP-mreB'-R124C</i>           | 15        |
| KC969           | <i>csrD::kan, mreB::msfGFP-mreB'-A174T</i>           | 15        |
| AV88            | <i>186::P<sub>Ter</sub>-dCas9, mreB::msfGFP-mreB</i> | This work |
| AV88 pAV20 G5   | <i>AV88 with pAV20 G5</i>                            | This work |
| AV88 pAV20 G10  | <i>AV88 with pAV20 G10</i>                           | This work |
| AV88 pAV20 G14  | <i>AV88 with pAV20 G14</i>                           | This work |
| AV88 pAV20 G20  | <i>AV88 with pAV20 G20</i>                           | This work |
| AV88 pcrRNA G10 | <i>AV88 with pcrRNA G10</i>                          | This work |
| AV88 pcrRNA G11 | <i>AV88 with pcrRNA G11</i>                          | This work |
| AV88 pcrRNA G14 | <i>AV88 with pcrRNA G14</i>                          | This work |
| AV88 pcrRNA G20 | <i>AV88 with pcrRNA G20</i>                          | This work |

1219

1220

### Table S4 – Plasmids used in this study

|                   |                                                                         |           |
|-------------------|-------------------------------------------------------------------------|-----------|
| <i>pAV20 G5</i>   | <i>guide RNA is sgRNA pAV20 G5, 5 matching base pairs against GFP</i>   | This work |
| <i>pAV20 G10</i>  | <i>guide RNA is sgRNA pAV20 G10, 10 matching base pairs against GFP</i> | This work |
| <i>pAV20 G14</i>  | <i>guide RNA is sgRNA pAV20 G14, 14 matching base pairs against GFP</i> | This work |
| <i>pAV20 G20</i>  | <i>guide RNA is sgRNA pAV20 G20, 20 matching base pairs against GFP</i> | This work |
| <i>pcrRNA G10</i> | <i>guide RNA is native crRNA, 10 matching base pairs against GFP</i>    | This work |
| <i>pcrRNA G11</i> | <i>guide RNA is native crRNA, 11 matching base pairs against GFP</i>    | This work |
| <i>pcrRNA G14</i> | <i>guide RNA is native crRNA, 14 matching base pairs against GFP</i>    | This work |
| <i>pcrRNA G20</i> | <i>guide RNA is native crRNA, 20 matching base pairs against GFP</i>    | This work |

1221

1222

1223

### Table S5 – Oligonucleotides used in this study

| Oligo  | Sequence                                                                   |
|--------|----------------------------------------------------------------------------|
| oJM028 | TTCTGCTCCCTCGCTCAG                                                         |
| oJM029 | CAGGGAGCACTGGTCAAC                                                         |
| oMD68  | TTTTACAGCTGATCCCATAGCGTAG                                                  |
| oMD69  | CTGGACAGGGCTCAGGTCCGGGATCTGGCATGAGGAGAAATAAACCAAAAAGCAAATC                 |
| oMD72  | AACATCACCTTTTCTATTTAATCGATCCATTCAAATACAGATGCATTTTATTTTC                    |
| oMD73  | ATACGAACGGTACTGAGCGAGGGAGCAGAAGAATTCGAGCTTGCATGCCTG                        |
| oMD75  | CAGCCGATAACCTTTTATTTGGCTG                                                  |
| oMD96  | TTTCACCAGAAGAAAACGTCCAATG                                                  |
| oMD108 | ACGAACGGTAGTTGACCAGTGCTCCCTGTCTTGACACTCCTTATTTGATTTTTGAAGAC                |
| oMD116 | CAGCCAGAAGCTGCTATCAATATCACTAC                                              |
| oMD125 | TACGAACGGTAGTTGACCAGTGCTCCCTGTTTACAGAAAGAAAAGACACTCAAGTAAGAG               |
| oMD134 | CCGAGCAGGGAAGATATTGAAG                                                     |
| oMD191 | TTTGGATGGATTCAGCCCGATTG                                                    |
| oMD196 | GGGCAAGGCTAGACGGG                                                          |
| oMD197 | TCACATACTCGTTTCCAACGGATC                                                   |
| oMD226 | GGTAGTTCCTCCTTAATCGATCCATTCAAATACAGATGCATTTTATTTTC                         |
| oMD227 | TTTGAATGGATCGATTAAGGAGGAACTACCATGTTTGAATCGGTACTAGAGACC                     |
| oMD228 | TTTCGGTAAGTCCCGTCTAGCCTTGCCCTTAAGAACGAACACCAAAGAATCGTTTAATAC               |
| oMD232 | GGTAGTTCCTCCTTAAAGCTTAATTGTTATCCGCTCACAAT                                  |
| oMD234 | ATACGAACGGTACTGAGCGAGGGAGCAGAATAATGGATTTCCCTTACGCGAAATACG                  |
| oMD298 | ATACGAACGGTAGTTGACCAGTGCTCCCTGATGTATGTATCTTCCCTTTCTTAAAGC                  |
| oMD299 | ATACGAACGGTACTGAGCGAGGGAGCAGAATGTGATAGAATCAAAGAGAAGAATCTGAC                |
| oMD300 | CTCTTCCTTTAACGGCCGATTG                                                     |
| oMD308 | ATGTATGTATCTTCTTTCTTAAAGCAAAAATACC                                         |
| oMD313 | ACAGCATATGCTTTGTGATTTCTTCTCTTTGATTCTATCACATTAAGAACGAACACCAAAGAATCGTTTAATAC |
| oMD314 | AAGAGAAGAATCTGACAAAGCATATGCTGTGTCAGGTTTTTTTTGTTTTTTCAGGGAGCACTGGTCAAC      |
| oMD315 | ATACGAACGGTACTGAGCGAGGGAGCAGAAGCCTGCTTTGTTCTTGACTAAACC                     |
| oMD316 | TAACAATTAAGCTTTAAGGAGGAACTACCATGAGGAGAATAAACCAAAAAGCAAATC                  |
| oMD328 | CCTGTTTCAGGTTCCGGTGATAC                                                    |
| oMD329 | ATACGAACGGTAGTTGACCAGTGCTCCCTGTAACGTCACCTTCCCTTTCCAGC                      |
| oMD334 | TTTGAATGGATCGATTAAGGAGGAACTACCATGTTTGAATGGTGCTAGAGAC                       |
| oMD364 | ATAACAATTAAGCTTTAAGGAGGAACTACCATGAGTGCATATAAGAAACAGCAAAGC                  |
| oMD365 | ATAACAATTAAGCTTTAAGGAGGAACTACCATGTCAGATCAATTTAACAGCCGTG                    |
| oMD367 | ACGAACGGTAGTTGACCAGTGCTCCCTGGCCAAGAACAGAAAAGAGGCGGCCTGTATGGC               |



|        |                                                                |
|--------|----------------------------------------------------------------|
| oMD369 | GAAAAGAGGGCGGCCTGTATGGCCGTCAAGAATTAAGATAACTTCTGTATTTTCGTCAG    |
| oMD370 | GAAAAGAGGGCGGCCTGTATGGCCGTTAATTTGTTTTTCAATGGATGATGAGTTTGTGTTG  |
| oMD371 | CGGCCATACAGGCCG                                                |
| oMD372 | GCTGACGGTAAAATCGCAATATC                                        |
| oMD379 | TGTTACATATTGCTGCTTTTTGGTCTTCACATGTATGTATCTTCCTTTCTTAAAGC       |
| oMD380 | GTGAAGACCAAAAAGCAGCAATATG                                      |
| oMD381 | ATACGAACGGTACTGAGCGAGGGAGCAGAAAAAACAAAAAACCTGACACAGCATATG      |
| oMD382 | ATACGAACGGTAGTTGACCAGTGCTCCCTGTGTGATAGAATCAAAGAGAAGAATCTGAC    |
| oMD386 | GTTTTCGCTGCTATATGACTGATTAGC                                    |
| oMD387 | ATACGAACGGTACTGAGCGAGGGAGCAGAATATGCAGACAGCCTTTACAGAGG          |
| oMD388 | ATACGAACGGTAGTTGACCAGTGCTCCCTGTCTATCCCGCCTTACATTTTCATCG        |
| oMD389 | TGTTGTATGGATTTTTCATCTTTACAGGTG                                 |
| oMD393 | ATGGATCGATTAAATAGAAAAGGTGATGTTATGAGGAGAAATAAAC                 |
| oMD394 | TTTGAATGGATCGATTAAGGAGGAACTACCATGAGTCGATATAAGAAACAGCAAAGC      |
| oMD395 | TGCACAAAAAAGACAGCCTCTG                                         |
| oMK001 | GCCTTATCCTTTCTCCGCC                                            |
| oMK002 | CTGAGCGAGGGAGCAGAACATCTCAACCTTTGTTAATCAACC                     |
| oMK005 | TACGAACGGTAGTTGACCAGTGCTCCCTGGTACACAATAAAAAACCTCCCGTTTTAACAG   |
| oMK006 | CGTGTACAAGCAAAGCAGAATGAAC                                      |
| oMK221 | TTCTTTCCGGTAAAGTCCCGTCTAGCCTTGCCCTTACTCATCTCTCAATTCTTTCTTTAGAC |
| oYS34  | TTCTTCCCTTTTTCGCATACTTGAGCCGCTGATTTCCATTTTAATCGCTTCAGCCG       |
| oYS35  | GCGATTAAAATGGAATCAGCGGCTCAAGTATGCGAAAAGGGGAAGAATTGTTTAC        |
| oYS36  | AGCTTCTGCAGATCCGCCAGGTGCTCCAGATTGTAAGTTTCATCCATTCCATGC         |
| oYS37  | GATGAACCTTTACAAATCTGGAGCACCTGGCGGATCTGCAGAAGCTCCTGAA           |
| oYS598 | GCCAGATCCCGGACCTGAGCCCTGTCCAGAGCCCGCCGCTGATTTCTAAGGTAGAAAAG    |
| oYS599 | GAGTGTCTTTTCTTTCTGTAAATAGAAAAGGTGATGTTATGGCAGAAATCGGTACTGGC    |
| V162   | GGTGTCTTTTTTGAACGAAAACCTCACGTTAAGGGATTTG                       |
| V163   | TAGCTGTCAACACTGAGCGTCAGACCCC                                   |
| V164   | ACGCTCAGTGTGACAGCTAGCTCAGTCTAGGTATAATACTAG                     |
| V165   | CGAGACCTAGACTGGTCTCACTAGTATTATACCTAGGACTGAGCTAGCTG             |
| V166   | ACTAGTGAGACCAGTCTAGGTCTCGTTTAGAGCTAGAAATAGCAAGTTAAATAAGG       |
| V167   | GAGTTTTCGTTCAAAAAAGCACCGACTCGGT                                |
| V272   | ctagtCACCACGAACAGAGAATTTGgt                                    |
| V273   | ctagtGTGGTGAACAGAGAATTTGgt                                     |
| V274   | ctagtGTGGTGCTTGAGAGAATTTGgt                                    |
| V275   | ctagtGTGGTGCTTGTCTTATTTGgt                                     |
| V279   | tagtAGACCCACGGAAGTAACGGA                                       |
| V280   | taaacCAAATTCTCTGTTCCGTGGTGa                                    |
| V281   | taaacCAAATTCTCTGTTCCACCACa                                     |
| V282   | taaacCAAATTCTCTCAAGCACCACa                                     |
| V283   | taaacCAAATAGAGACAAGCACCACa                                     |
| V287   | aaacTCCGTTACTCCGTGGGTCT                                        |

1224  
1225  
1226

## Supplemental References

1. Grimm, J. B. *et al.* A general method to improve fluorophores for live-cell and single-molecule microscopy. *Nat Meth* **12**, 244–250 (2015).
2. Ursell, T. *et al.* Rapid, precise quantification of bacterial cellular dimensions across a genomic-scale knockout library. *BMC Biology* **15**, 17 (2017).
3. Vadia, S. & Levin, P. A. Growth rate and cell size: a re-examination of the growth law. *Curr Opin Microbiol* **24**, 96–103 (2015).
4. Ursell, T. S. *et al.* Rod-like bacterial shape is maintained by feedback between cell curvature and cytoskeletal localization. *Proc Natl Acad Sci USA* **111**, E1025–34 (2014).
5. Wiseman, P. W. Image correlation spectroscopy: mapping correlations in space, time, and reciprocal space. - PubMed - NCBI. *Fluorescence Fluctuation Spectroscopy (FFS), Part A* **518**, 245–267 (2013).
6. Sharpe, M. E., Hauser, P. M., Sharpe, R. G. & Errington, J. Bacillus subtilis cell cycle as studied by fluorescence microscopy: constancy of cell length at initiation of DNA replication and evidence for active nucleoid partitioning. *J Bacteriol* **180**, 547–555 (1998).
7. Vollmer, W., Blanot, D. & de Pedro, M. A. Peptidoglycan structure and architecture. *FEMS Microbiol Rev* **32**, 149–167 (2008).
8. Kner, P., Chhun, B. B., Griffis, E. R., Winoto, L. & Gustafsson, M. G. L. Super-resolution video microscopy of live cells by structured illumination. *Nat Meth* **6**, 339–342 (2009).
9. Vigouroux, A., Oldewurtel, E., Cui, L., Bikard, D. & van Teeffelen, S. Tuning dCas9's ability to block transcription enables robust, noiseless knockdown of bacterial genes. *Molecular Systems Biology* **14**, e7899 (2018).
10. Kall, L., Storey, J. D. & Noble, W. S. Non-parametric estimation of posterior error probabilities associated with peptides identified by tandem mass spectrometry. *Bioinformatics* **24**, i42–i48 (2008).
11. Gibson, D. G. *et al.* Enzymatic assembly of DNA molecules up to several hundred kilobases. *Nat Meth* **6**, 343–U41 (2009).
12. Schirner, K. *et al.* Lipid-linked cell wall precursors regulate membrane association of bacterial actin MreB. *Nat. Chem. Biol.* **11**, 38–45 (2015).
13. Ouzounov, N. *et al.* MreB Orientation Correlates with Cell Diameter in Escherichia coli. *Biophys J* **111**, 1035–1043 (2016).
14. Morgenstein, R. M. *et al.* RodZ links MreB to cell wall synthesis to mediate MreB rotation and robust morphogenesis. *Proc Natl Acad Sci USA* **112**, 12510–12515 (2015).
15. Colavin, A., Shi, H. & Huang, K. C. RodZ modulates geometric localization of the bacterial actin MreB to regulate cell shape. *Nat Comms* **9**, 1280 (2018).
16. Tropini, C. *et al.* Principles of Bacterial Cell-Size Determination Revealed by Cell-Wall Synthesis Perturbations. *Cell Reports* **9**, 1520–1527 (2014).
17. Cho, H. *et al.* Bacterial cell wall biogenesis is mediated by SEDS and PBP polymerase families functioning semi-autonomously. *Nat Microbiol* **1**, 16172 (2016).
18. Garner, E. C. *et al.* Coupled, circumferential motions of the cell wall synthesis machinery and MreB filaments in B. subtilis. *Science* **333**, 222–225 (2011).
19. Meeske, A. J. *et al.* SEDS proteins are a widespread family of bacterial cell wall polymerases. *Nature* **537**, 634–638 (2016).
20. Hussain, S. *et al.* MreB filaments align along greatest principal membrane curvature to orient cell wall synthesis. *Elife* **7**, 1239 (2018).
